# Supplementary material for: Towards tailoring of self-management for patients with chronic heart failure or chronic obstructive pulmonary disease: a protocol for an individual patient data meta-analysis
Source: PubMed Central journal article supplement — BMJ Open. 2014 May 23;4(5):e005220. doi: 10.1136/bmjopen-2014-005220 (PMC4039847; doi:10.1136/bmjopen-2014-005220), 2014-05-23
Supplement: bmjopen-2014-005220.draft_revisions.pdf [file bmjopen-2014-005220.draft_revisions.pdf]

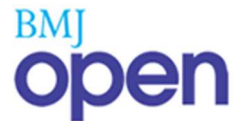

**Towards tailoring of self-management for patients with chronic heart failure or chronic obstructive pulmonary disease: rationale and design for an individual patient data meta-analysis**

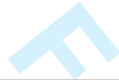

|                                 |                                                                                                                                                                                                                                                                                                                                                                                                                                                                                                                                                                                                                                                                                                                                                                                                                                                                                                                                                                                                                                                                                      |
|---------------------------------|--------------------------------------------------------------------------------------------------------------------------------------------------------------------------------------------------------------------------------------------------------------------------------------------------------------------------------------------------------------------------------------------------------------------------------------------------------------------------------------------------------------------------------------------------------------------------------------------------------------------------------------------------------------------------------------------------------------------------------------------------------------------------------------------------------------------------------------------------------------------------------------------------------------------------------------------------------------------------------------------------------------------------------------------------------------------------------------|
| Journal:                        | <i>BMJ Open</i>                                                                                                                                                                                                                                                                                                                                                                                                                                                                                                                                                                                                                                                                                                                                                                                                                                                                                                                                                                                                                                                                      |
| Manuscript ID:                  | bmjopen-2014-005220                                                                                                                                                                                                                                                                                                                                                                                                                                                                                                                                                                                                                                                                                                                                                                                                                                                                                                                                                                                                                                                                  |
| Article Type:                   | Protocol                                                                                                                                                                                                                                                                                                                                                                                                                                                                                                                                                                                                                                                                                                                                                                                                                                                                                                                                                                                                                                                                             |
| Date Submitted by the Author:   | 07-Mar-2014                                                                                                                                                                                                                                                                                                                                                                                                                                                                                                                                                                                                                                                                                                                                                                                                                                                                                                                                                                                                                                                                          |
| Complete List of Authors:       | Jonkman, Nini; University Medical Center Utrecht, Rehabilitation, Nursing Science and Sports<br>Westland, Heleen; University Medical Center Utrecht, Rehabilitation, Nursing Science and Sports<br>Trappenburg, Jaap; University Medical Center Utrecht, Rehabilitation, Nursing Science and Sports<br>Groenwold, Rolf; University Medical Center Utrecht, Julius Center for Health Sciences and Primary Care<br>Effing-Tijdhof, Tanja; Repatriation General Hospital, Department of Respiratory Medicine<br>Troosters, Thierry; Catholic University of Leuven, Department of Rehabilitation Sciences<br>van der Palen, Job; University of Twente, Department of Research Methodology, Measurement and Data Analysis<br>Bourbeau, Jean; McGill University, Respiratory Epidemiology Unit<br>Jaarsma, Tiny; Linköping University, Department of Social and Welfare Studies<br>Hoes, Arno; University Medical Center Utrecht, Julius Center for Health Sciences and Primary Care<br>Schuurmans, Marieke; University Medical Center Utrecht, Rehabilitation, Nursing Science and Sports |
| <b>Primary Subject Heading</b>: | Patient-centred medicine                                                                                                                                                                                                                                                                                                                                                                                                                                                                                                                                                                                                                                                                                                                                                                                                                                                                                                                                                                                                                                                             |
| Secondary Subject Heading:      | Nursing, Epidemiology                                                                                                                                                                                                                                                                                                                                                                                                                                                                                                                                                                                                                                                                                                                                                                                                                                                                                                                                                                                                                                                                |
| Keywords:                       | individual patient data meta-analysis, self-management, chronic disease, chronic heart failure, COPD                                                                                                                                                                                                                                                                                                                                                                                                                                                                                                                                                                                                                                                                                                                                                                                                                                                                                                                                                                                 |
|                                 |                                                                                                                                                                                                                                                                                                                                                                                                                                                                                                                                                                                                                                                                                                                                                                                                                                                                                                                                                                                                                                                                                      |

SCHOLARONE™  
Manuscripts

1  
2  
3  
4  
5  
6  
7  
8  
9  
10  
11  
12  
13  
14  
15  
16  
17  
18  
19  
20  
21  
22  
23  
24  
25  
26  
27  
28  
29  
30  
31  
32  
33  
34  
35  
36  
37  
38  
39  
40  
41  
42  
43  
44

## Towards tailoring of self-management for patients with chronic heart failure or chronic obstructive pulmonary disease: rationale and design for an individual patient data meta-analysis

Nini H. Jonkman<sup>1</sup>, Heleen Westland<sup>1</sup>, Jaap C.A. Trappenburg<sup>1</sup>, Rolf H.H. Groenwold<sup>2</sup>, Tanja W. Effing-Tijdhof<sup>3</sup>, Thierry Troosters<sup>4</sup>, Job van der Palen<sup>5</sup>, Jean Bourbeau<sup>6</sup>, Tiny Jaarsma<sup>7</sup>, Arno W. Hoes<sup>2</sup>, Marieke J. Schuurmans<sup>1</sup>

**Corresponding author:** Nini H. Jonkman

**Postal address:** University Medical Center Utrecht, Department of Rehabilitation, Nursing Science & Sports, HP W01.121, Heidelberglaan 100, 3508 GA Utrecht, The Netherlands

**E-mail:** n.jonkman@umcutrecht.nl

**Telephone:** +316 50 12 49 34

<sup>1</sup> Department of Rehabilitation, Nursing Science and Sports, University Medical Center Utrecht, Utrecht, The Netherlands

<sup>2</sup> Julius Center for Health Sciences and Primary Care, University Medical Center Utrecht, Utrecht, The Netherlands

<sup>3</sup> Department of Respiratory Medicine, Repatriation General Hospital, Daw Park, South Australia, Australia

<sup>4</sup> Department of Rehabilitation Sciences, Catholic University of Leuven, Leuven, Belgium

<sup>5</sup> Department of Research Methodology, Measurement and Data Analysis, University of Twente, Enschede, The Netherlands

<sup>6</sup> Respiratory Epidemiology Unit, McGill University, Montreal, Quebec, Canada

<sup>7</sup> Department of Social and Welfare Studies, Linköping University, Linköping, Sweden

45  
46  
47  
48  
49  
50  
51  
52  
53  
54  
55  
56  
57  
58  
59  
60

### Keywords:

individual patient data meta-analysis, self-management, chronic disease, chronic heart failure, COPD

**Word count:** 3.369

## ABSTRACT

**Introduction:** Self-management interventions in patients with chronic conditions have received increasing attention over the last years, yet meta-analyses encountered considerable heterogeneity in results. This suggests that effectiveness of self-management interventions must be assessed in the context of which components are responsible for eliciting the effect and in which subgroups of patients the intervention works best. The aim of the present study is to identify condition-transcending determinants of success of self-management interventions in two parallel individual patient data meta-analyses of self-management trials in patients with congestive heart failure (CHF) and in patients with chronic obstructive pulmonary disease (COPD).

**Methods and analysis:** Investigators of 53 randomized trials (32 in CHF and 21 in COPD) will be requested to share their de-identified individual patient data. Data will be analysed using random effects models, taking clustering within studies into account. Effect modification by age, sex, disease severity, symptom status, comorbid conditions and level of education will be assessed. Sensitivity analyses will be conducted to assess robustness of findings.

**Ethics and dissemination:** The de-identified individual patient data are used only for the purpose for which they were originally collected and for which ethical approval has been obtained by the original investigators. Knowledge on the effective ingredients of self-management programs and identification of subgroups of patients in which those interventions are most effective will guide the development of evidence-based personalised self-management interventions for patients with CHF and COPD, but also with other chronic diseases. This protocol has been registered in PROSPERO: CRD42013004698.

**STRENGTHS AND LIMITATIONS OF THIS STUDY**

- This individual patient data (IPD) meta-analysis will evaluate the effects of self-management interventions across two chronic conditions: patients with chronic heart failure and patients with chronic obstructive pulmonary disease.
- Embedding of the study in an international network and careful consideration of methodological challenges of the IPD approach have resulted in a robust design of data collection and analysis.
- Retrieval bias might occur if not all original investigators are willing or able to participate and not all individual patient data can be included.

For peer review only

## INTRODUCTION

With the rising number of people suffering from one or more chronic conditions,[1,2] interventions to support self-management have received increasing attention over the last years. Such interventions aim to teach patients the skills to actively participate in the management of their chronic condition and generally comprise skills for symptom monitoring, management of medication use and changing health behaviours.[3]

The evidence presented so far in meta-analyses seems to favour self-management interventions for improving a range of outcomes in various patient groups.[4-10] Yet, several authors encountered considerable heterogeneity in the outcomes analysed,[4,9] sometimes leading to contradictory findings.[11,12] A recently published large randomised controlled trial among patients with chronic obstructive pulmonary disease (COPD) even reported unexplained higher mortality rates among the patients in the intervention group, who received one group session and multiple individual sessions addressing problem-solving techniques and lifestyle changes, followed up by telephone contacts.[13]

One explanation for those ambiguous findings might be the high variation across studies evaluating self-management interventions. Self-management interventions can be regarded as complex interventions.[14] The intervention studies not only differ in procedural aspects such as content, duration and intensity,[14] but also in patient populations included and outcomes measured.[15] The question whether self-management interventions are effective cannot be answered without considering which components are responsible for eliciting the effect and identifying in which subgroups of patients the intervention is most effective. Few attempts have been made to identify determinants of success across conditions,[15] which is rather surprising since a majority of the patients with a chronic condition suffers from comorbidity.[16,17] Individual trials in different chronic conditions have reported large proportions of non-complying and non-responding patients.[3] Based on these results, the question arises if barriers to adhere to interventions and adopt self-management behaviour are disease-specific or transcend specific conditions.

Combination of studies in a meta-analysis or meta-regression might provide insight in which program-specific components are likely to be effective. Intervention studies, however, may not only differ with regard to the intervention evaluated, but also with regard to characteristics of the population included. Comparisons of patient characteristics across studies based on aggregate data in a 'classical' meta-analysis may be subjective to ecological bias.[18] A meta-analysis of individual patient data (IPD) overcomes this potential drawback and enables a straightforward analysis of both subgroups of patients in whom the intervention will be most effective and the effects of relevant components of the studied (complex) interventions.[19] Sufficient power for analysing subgroups is warranted due to the larger numbers of patients included in the analyses, which overcomes the problems with limited power of subgroup analyses experienced in individual trials.[19,20] An IPD meta-analysis therefore seems an attractive approach for unravelling the determinants of success of self-management interventions.

In order to discover determinants of success of self-management interventions for chronic disease 'at large' (i.e. condition-transcending), the present study will initiate two parallel IPD meta-analyses of self-management trials in two different chronic conditions: in patients with chronic heart failure (CHF) and in patients with COPD. The focus will be on patients with CHF or COPD because of the large number of patients confronted with either one or both of

1  
2 these conditions[2,21] and the large number of available self-management trials. Although the  
3 management of these conditions differs considerably, both patient groups are confronted with  
4 daily adherence to a drug treatment and lifestyle advice and monitoring of signs and  
5 symptoms is important for the prevention or timely detection of exacerbations.[21,22] This  
6 makes self-management an inevitable part of care for those patients groups.[21,23] In both  
7 conditions self-management interventions are extensively studied, but outcomes of published  
8 studies are heterogeneous.[6,11]  
9  
10

## 11 12 **Objectives**

13 The present paper provides a detailed description of the rationale and design for this IPD  
14 meta-analysis. The primary objective is to identify both program- and patient-specific  
15 determinants of the effect of self-management interventions on health-related quality of life  
16 (HRQoL), mortality, all-cause and disease-related hospital admissions and days in hospital in  
17 patients with CHF and patients with COPD.  
18  
19

20 In addition to two independent analyses for self-management trials in patients with CHF  
21 and patients with COPD, we will compare the results in both patient groups and investigate  
22 the similarities and differences in determinants. The secondary objective is to identify  
23 program- and patient-specific determinants of successful self-management interventions in  
24 chronic disease ‘at large’, i.e. condition-transcendent determinants.  
25  
26  
27

## 28 **METHODS AND ANALYSIS**

### 29 **Identification of studies**

30 An extensive literature search has been conducted in the electronic databases of PubMed,  
31 EMBASE, Cochrane Central Register on Controlled Trials, PsycINFO and CINAHL from  
32 January 1985 to April 2013. MeSH terms and key words in title and abstract used were  
33 “chronic heart failure”, “chronic obstructive pulmonary disease”, “self-management”, “self-  
34 care”, “patient-education”, “randomised controlled trial”, and synonyms (see online  
35 supplementary appendix 1 for PubMed search strategy as an example of the complete search  
36 terms). Reference lists of relevant systematic reviews were hand-searched and experts in the  
37 domain were consulted to ensure a complete coverage of relevant studies.  
38  
39  
40  
41

### 42 **Included studies**

43 Studies included in this IPD meta-analysis are randomised controlled trials (RCTs) with  
44 concealed allocation to treatment, conducted in patients with an established diagnosis of CHF  
45 or COPD according to the prevailing international clinical guidelines.[21,23] Since a gold  
46 standard of which essential elements constitute a self-management intervention is lacking,[24]  
47 an extensive literature search was performed before an international group of 7 experts  
48 reached consensus during a conference meeting on essential components for defining ‘self-  
49 management intervention’. This resulted in a definition requiring inclusion of a minimum of  
50 two of the following components in the intervention: (1) active stimulation of symptom  
51 monitoring, (2) education in problem solving skills (i.e. self-treatment such as managing acute  
52 exacerbations, resource utilisation, stress/symptom management) and enhancement of (3)  
53 medication adherence, (4) physical activity, (5) dietary intake or (6) smoking cessation. The  
54 intervention selection is schematically presented in Figure 1.  
55  
56  
57  
58  
59  
60

1  
2  
3  
4  
5  
6  
7  
8  
9  
10  
11  
12  
13  
14  
15  
16  
17  
18  
19  
20  
21  
22  
23  
24  
25  
26  
27  
28  
29  
30  
31  
32  
33  
34  
35  
36  
37  
38  
39  
40  
41  
42  
43  
44  
45  
46  
47  
48  
49  
50  
51  
52  
53  
54  
55  
56  
57  
58  
59  
60

Studies are included in the IPD meta-analysis if they (1) studied an intervention which fulfilled the requirements of the definition of self-management intervention, (2) compared the self-management intervention to usual care or another self-management intervention, (3) reported data on one or more of the relevant outcomes for this IPD meta-analysis (see below), (4) followed patients for at least six months and (5) were reported in English, Dutch, French, German, Italian, Portuguese or Spanish.

### Methodological quality

Quality appraisal is performed by two independent researchers not involved in any of the primary studies. Methodological quality of the studies is assessed through three relevant criteria based on the 'Risk of bias' tool from the Cochrane Collaboration:[25]

1. Random concealed allocation to treatment;
2. Intention-to-treat analysis;
3. Other deviances (e.g. discrepancies in baseline characteristics, high drop-out rates with unbalances between groups, risk of contamination).

Discrepancies between the two researchers are solved through discussion with a third researcher. Results of the quality appraisal will be applied in sensitivity analyses including only studies with a low risk of bias to assess the impact of studies of lower methodological quality.

### Data collection

Fifty-three RCTs (32 in CHF patients, 21 in COPD patients) have been selected for this IPD meta-analysis. The original investigators are requested to participate in this IPD meta-analysis through an invitation by e-mail, written in English, Spanish, Portuguese or Dutch. Email addresses have been obtained through contact details of recent publications or retrieval of affiliations. A reminder is sent after several weeks if no response is received, after which other investigators of the original trial will be approached. Only after written agreement, investigators will be asked to send their encrypted data, preferably electronically by creating encrypted files (in a WinZip file). Standardised data collection forms with the minimum required data items are provided to investigators, but they can send their data in any format most convenient for them (e.g. SAS, SPSS, Microsoft Excel spread sheet). Additionally, investigators are asked to check the extracted intervention characteristics from their studies to ensure a correct interpretation of interventions.

Data items to be collected are based on clinical relevance, previously reported meta-analyses (program specific determinants) and subgroup analyses in RCTs (patient specific determinants). Table 1 presents the data items investigators are requested to share.

Data will be saved in the original format as sent by the investigator and subsequently will be converted to a common SPSS format (IBM Corp. Released 2011. IBM SPSS Statistics for Windows, V.20.0 Armonk, New York: IBM Corp) for data checking and recoding. Data of each trial will be checked with regard to range of the variables measured, extreme values, internal consistency, missing values and consistency with published reports. The details of the interventions as presented in Table 2 are cross-checked with trial protocols and published reports. Discrepancies with published results, missing data or inconsistencies will be verified with the original investigators and any problems resolved by consensus.

1  
2  
3  
4  
5  
6  
7  
8  
9  
10  
11  
12  
13  
14  
15  
16  
17  
18  
19  
20  
21  
22  
23  
24  
25  
26  
27  
28  
29  
30  
31  
32  
33  
34  
35  
36  
37  
38  
39  
40  
41  
42  
43  
44  
45  
46  
47  
48  
49  
50  
51  
52  
53  
54  
55  
56  
57  
58  
59  
60

Across studies, variables might be coded differently and recoding may be necessary to create uniform categories in the combined dataset. To ensure correct interpretation of original categories and a correct recoding, new categories are only coded after consultation of the original investigators. All datasets from individual trials will be assigned a unique trial ID before being merged into the central database.

### **Project management**

One of the major challenges in IPD meta-analyses is good communication across cultural and language barriers, careful management of and negotiating with collaborating investigators.[20] For this IPD meta-analysis an international collaborative study group is established, the TASTE-IPD (Tailoring of Self-managemenT and E-health Individual Patient Data) study group. From each original trial one representative becomes a member of the collaboration. Representatives of the trials will be invited to teleconferences (at least twice a year) and meetings scheduled during international conferences (annually). Separate teleconferences/meetings will be held for the COPD and CHF trials. During those meetings major methodological decisions and (preliminary) results will be discussed. Between meetings, members of the study group are updated on study progress through newsletters. Before submission of a manuscript for publication, a draft version will be circulated among investigators to allow for comments, revision and approval. Publications are authored with names of the investigators where possible and on behalf of the collaboration as a whole with names of other participating investigators listed in the acknowledgements. During the project, the collaboration might decide upon new research questions which can be answered through re-analysis of the combined database.

The collaboration contains a project management team responsible for management decisions within the collaboration, communication with investigators and organising teleconferences and meetings. Its members carry the responsibility for the decisions with regard to daily management of the study, collection of the individual data, development of the core dataset and statistical analysis. The project management team is supported by expert members, who are self-management experts in the fields of either CHF or COPD.

### **Outcome measures**

The present study will focus on various outcome measures. These include:

1. Change in HRQoL at 6 months and at 12 months. A distinction is made between disease-specific and generic HRQoL to address the different assessment of HRQoL applied in the original studies;
2. Mortality (time-to-event, % death at 6 months and at 12 months);
3. Hospitalised for any cause (time-to-event, % hospitalised at 6 months and at 12 months);
4. Total number of days spent in hospital for any cause at 6 months and at 12 months;
5. Hospitalised for resp. CHF or COPD (time-to-event, % hospitalised at 6 months and at 12 months);
6. Total number of days spent in hospital for resp. CHF or COPD at 6 months and at 12 months.



## Statistical analyses

First, statistical analyses will be performed for CHF and COPD studies separately to meet the primary objective, but analyses will be similar. To address the secondary objective, analyses will be repeated combining the data from both patient groups to assess whether effect determinants the specific chronic condition. An additional covariate will be included in the models below to indicate the specific condition. All analyses will be performed in R for Windows version 2.15.3 (R Development Core Team. Released 2013. Vienna, Austria: R Foundation for Statistical Computing), according to the intention-to-treat principle. Missing data in studies will be addressed by using multiple imputation by chained equations.[26] Missing values will only be imputed within studies.

The IPD will be analysed using a one-stage approach, i.e. simultaneously analysing all observations while accounting for clustering of observations within studies.[27] For time-to-event data, effects of self-management will be quantified by estimating hazard ratios (HR) and 95% confidence interval (CI). Cox proportional-hazard models will be used to analyse the data, including a cluster statement to allow inter study variability. For binary outcome data (mortality, all-cause and disease-related hospital admissions), risk ratios (RR) and 95% CI will be estimated using log-binomial mixed effects models. Effects on continuous outcomes (HRQoL and days in hospital) will be quantified by mean differences and 95% CI and will be estimated using linear mixed effects models. In the log-binomial and linear mixed effects models, random intercepts and random slopes will be included to take clustering within studies into account. Heterogeneity is assessed with the  $I^2$  statistic.[28]

### *Program-specific determinants*

To identify program-specific determinants of self-management interventions, the aforementioned models are complemented with covariates for program characteristics. Table 2 presents an overview of potential program-specific determinants to be studied. The program-specific determinants are based on social cognitive theory,[29] self-management literature[24,30,31] and successful behavioural techniques.[32] Additionally, intensity and duration of interventions will be studied, since these have shown to be related to outcomes in behavioural interventions.[33] Program-specific determinants are considered significant if the p-value is <0.05.

### *Patient-specific determinants*

The aforementioned models will be extended to study effect modification by patient characteristics. Effect modification implies that the effect of the intervention on an outcome differs depending on the value of a third variable, the effect modifier. This can be studied by including interaction terms in the models. An overview of potential effect modifiers is presented in Table 2. This is a selection of clinically relevant variables, which can be expected to have been collected across the majority of trials in a comparable manner. Next to age, sex, disease severity and symptom status, the present study will focus on comorbid conditions (with specific attention to depression) and level of education, as those variables have been shown to be related to change in self-management behaviour in chronic patients.[34,35] Since the amount of effect modifiers included in the models is restricted by the total number of patients included for analysis, the optional patient-specific effect modifiers will only be included if sufficient patient data are available.

1  
2  
3  
4  
5  
6  
7  
8  
9  
10  
11  
12  
13  
14  
15  
16  
17  
18  
19  
20  
21  
22  
23  
24  
25  
26  
27  
28  
29  
30  
31  
32  
33  
34  
35  
36  
37  
38  
39  
40  
41  
42  
43  
44  
45  
46  
47  
48  
49  
50  
51  
52  
53  
54  
55  
56  
57  
58  
59  
60

To assess whether the effect of self-management is modified by pre-specified patient characteristics, each model will include interaction terms for the patient characteristics in Table 2. Hence, the independent variables in each model are the random intercepts and slopes for the individual studies, the self-management intervention, specific patient characteristic, and interaction terms (self-management by patient characteristic), with the outcome as a dependent variable. Coefficients of interaction terms will be presented with 95% CI.

### *Sensitivity analysis*

Sensitivity analysis will be performed to assess the robustness of the findings. Inclusion of aggregate data of studies for which IPD are unavailable will be performed to test whether IPD are representative of all eligible studies. A complete-case analysis will be carried out to assess the effects of imputing missing data. In addition, inclusion of only studies with a low risk of bias will be performed to assess the impact of studies of lower methodological quality on the findings. Adaptations to the statistical analysis plan will be made only after the study group has been consulted and consensus has been reached.

### **ETHICS AND DISSEMINATION**

This IPD meta-analysis has been exempted from the Medical Research Involving Human Subjects Act of the Netherlands by the Medical Ethics Research Committee of the University Medical Center Utrecht. The de-identified individual patient data are used only for the purpose for which they were originally collected and for which ethical approval has been obtained by the individual studies. In the case of re-analysis of de-identified patient data, informed consent is not deemed necessary. Data will be included in the IPD-meta-analysis only after written agreement of the original investigator and after de-identification. Data will remain property of the original investigators at all times, and they have the right to withdraw their data from the study. The shared datasets will not be used for other purposes than declared in the protocol without permission of the original investigators. Data are considered confidential and will be stored on a secured location on the digital network of the UMC Utrecht, that can only be accessed by the members of the project management team.

This project is embedded in the research line Tailoring of Self-management and E-health (TASTE), which aims to enhance the effectiveness of self-management for chronic conditions.[36] Consolidation of generating high quality scientific output is strengthened by collaboration with international universities, educational institutes and patient/provider organisations. Results of this IPD meta-analysis will be disseminated in international peer-reviewed journals and at international conferences.

### **DISCUSSION**

To our knowledge, the present study will be the first IPD meta-analysis on comprehensive self-management interventions to be conducted across two chronic conditions: CHF and COPD. We aim to identify in each patient group which program-specific and patient-specific determinants modify the effects of self-management interventions on health-related quality of life, mortality and health care use. Our secondary aim is to identify which determinants transcend both conditions and are associated with better outcomes of self-management interventions in chronic disease 'at large'. This is crucial information in view of the common

1  
2 approaches in self-management strategies across conditions and the rising number of patients  
3 with multiple chronic conditions.[16,17]  
4

5 A re-analysis of self-management trials on the level of individual patients is essential to  
6 study both program and patient characteristics as possible determinants of success.[18] IPD  
7 meta-analyses are still quite rare in the field of complex interventions,[37-39] even though the  
8 literature on methodology of IPD meta-analyses is increasing.[27] Substantial efforts have  
9 been made to carefully design the present IPD meta-analysis and anticipate on the limitations  
10 of the IPD approach. Based on lessons learned from other IPD meta-analyses in this area, the  
11 important methodological considerations are met as is shown in Table 3.[37-39] With our  
12 extensive search strategy we have minimised the chance of missing relevant trials. Since self-  
13 management interventions are complex interventions, a clear definition of in- and exclusion  
14 criteria is essential for a transparent selection of studies included. We carefully discussed and  
15 documented the reasons underlying our choice of the required data items, statistical plan and  
16 pre-planned sensitivity analyses to ensure that we collect the necessary information to assess  
17 the robustness of findings and minimise bias.  
18  
19

20  
21 Despite our careful methodological considerations, some of our methodological choices  
22 can be discussed. First, the choice of inclusion date. The earliest study included in our  
23 selection dates back to 1995, resulting in a timespan of nearly twenty years over which  
24 individual trials were conducted. To ensure completeness we have chosen not to exclude the  
25 first self-management trials, although the 'usual care' provided to control groups in these  
26 studies will not be comparable to usual care more recent. Second, for our primary analysis we  
27 have chosen to impute missing data only within studies. With this approach we will limit our  
28 analysis to the studies which have provided data on the selected effect modifiers, which might  
29 introduce bias if data are not missing completely at random. Another solution might be to  
30 impute missing data across studies. Yet, required multilevel methods to achieve this are quite  
31 novel and multiple imputation is generally recommended for imputing sporadic missing  
32 values instead of systematically missing data.[40] As non-collected data will be  
33 systematically missing in that specific study, we have chosen the conventional approach of  
34 multiple imputation within studies only. Third, the quality of our findings is highly depended  
35 on the quality of the original design, the quality and completeness of the data, and the level of  
36 detail provided by the original researchers.[25] Retrieval bias may occur if not all original  
37 investigators are willing or able to participate and we cannot obtain all IPD. Therefore,  
38 sensitivity analyses are planned to assess the impact on our findings.  
39  
40  
41  
42  
43  
44

45 With this planned IPD meta-analysis we aim to advance our understanding of  
46 effectiveness of self-management interventions. Knowledge on the effective ingredients of  
47 programs contributes to the development of evidence-based personalised self-management  
48 interventions. By identifying subgroups of patients in which self-management interventions  
49 are most effective, we will be better able to tailor future interventions and personalise care for  
50 patients with chronic disease.  
51  
52  
53  
54  
55  
56  
57  
58  
59  
60

**Table 1: Data items investigators are requested to share.**

| <b>Study level<br/>Methodology</b>                                                                                                                                                    | <b>Study level<br/>Intervention</b>                                                                                                                                                                                                                                        | <b>Patient level<br/>Characteristics<br/>at baseline</b>                                                                                                                                                                                                                                                                                                                                                                                                | <b>Patient level<br/>Intervention as<br/>implemented</b>                                                                                                                                                                                         | <b>Patient level<br/>Outcomes</b>                                                                                                                                                                                                                                                                                                                                                                               |
|---------------------------------------------------------------------------------------------------------------------------------------------------------------------------------------|----------------------------------------------------------------------------------------------------------------------------------------------------------------------------------------------------------------------------------------------------------------------------|---------------------------------------------------------------------------------------------------------------------------------------------------------------------------------------------------------------------------------------------------------------------------------------------------------------------------------------------------------------------------------------------------------------------------------------------------------|--------------------------------------------------------------------------------------------------------------------------------------------------------------------------------------------------------------------------------------------------|-----------------------------------------------------------------------------------------------------------------------------------------------------------------------------------------------------------------------------------------------------------------------------------------------------------------------------------------------------------------------------------------------------------------|
| <ul style="list-style-type: none"> <li>• Year of recruitment</li> <li>• Location of recruitment</li> <li>• Method of randomisation</li> <li>• Blinding to group assignment</li> </ul> | <ul style="list-style-type: none"> <li>• Mode(s) of delivery</li> <li>• Content covered in intervention</li> <li>• Number of planned contacts during intervention</li> <li>• Duration of the intervention</li> <li>• Type of training given to interventionists</li> </ul> | <ul style="list-style-type: none"> <li>• Sex</li> <li>• Age</li> <li>• Years since diagnosis</li> <li>• Disease severity (CHF=LVEF; COPD=FEV1%, FEV1, FVC)</li> <li>• Symptom status (CHF = NYHA class; COPD = dyspnoea)</li> <li>• Comorbid conditions</li> <li>• Level of education</li> <li>• Ethnic minority</li> <li>• Living alone</li> <li>• Self-efficacy</li> <li>• Depression</li> <li>• Body mass index</li> <li>• Smoking status</li> </ul> | <ul style="list-style-type: none"> <li>• Number of actual contacts with patient during intervention</li> <li>• Content covered with individual patient</li> <li>• Targeted behaviour achieved</li> <li>• Loss-to-follow-up and reason</li> </ul> | <ul style="list-style-type: none"> <li>• Health-related quality of life (score on instrument)</li> <li>• Mortality (yes/no; time-to-event)</li> <li>• All-cause hospital admissions (#; time-to-first-event)</li> <li>• Disease-related hospital admissions (#; time-to-first-event)</li> <li>• All-cause days in hospital (total # days)</li> <li>• Disease-related days in hospital (total # days)</li> </ul> |

CHF = chronic/congestive heart failure; COPD = chronic obstructive pulmonary disease; FEV1 = forced expiratory volume in 1 second; FEV1% = predicted forced expiratory volume in 1 second; FVC = forced vital capacity; LVEF = left ventricular ejection fraction; NYHA = New York Heart Association.

**Table 2: Determinants to be analysed.**

| Determinants            |                                                                                                                                                                                                                                                                                                                                                                                                                                                                                                                             |
|-------------------------|-----------------------------------------------------------------------------------------------------------------------------------------------------------------------------------------------------------------------------------------------------------------------------------------------------------------------------------------------------------------------------------------------------------------------------------------------------------------------------------------------------------------------------|
| <b>Program-specific</b> | <ul style="list-style-type: none"> <li>• Number of planned contacts</li> <li>• Duration of the intervention</li> <li>• Training given to interventionists (standardised/heterogeneous)†</li> <li>• Group contact with peers (y/n)*†</li> <li>• Keeping diaries for symptom-monitoring (y/n)‡</li> <li>• Goal-setting skills (y/n)*†</li> <li>• Problem-solving skills (y/n)*†</li> <li>• Support allocation skills (y/n)†</li> </ul>                                                                                        |
| <b>Patient-specific</b> | <ul style="list-style-type: none"> <li>• Sex</li> <li>• Age</li> <li>• Disease severity</li> <li>• Symptom severity</li> <li>• Number of comorbid conditions</li> <li>• Depression</li> <li>• Level of education</li> </ul> <p><i>Optional variables (only analysed if sufficient data available):</i></p> <ul style="list-style-type: none"> <li>• <i>Recently diagnosed</i></li> <li>• <i>Self-efficacy</i></li> <li>• <i>Living status</i></li> <li>• <i>Body Mass Index</i></li> <li>• <i>Smoking status</i></li> </ul> |

\*based on social cognitive theory; †based on self-management literature; ‡based on behavioural techniques.

**Table 3: Comparison of meta-analyses of individual patient data on self-monitoring/self-management.**

| Study                                                                 | Farmer et al.[37]<br><i>Self-monitoring of blood glucose</i> | Heneghan et al.[38]<br><i>Self-monitoring of oral anticoagulation</i> | Pickup et al.[39]<br><i>Self-monitoring of blood glucose</i> | TASTE-IPD<br><i>Self-management</i>         |
|-----------------------------------------------------------------------|--------------------------------------------------------------|-----------------------------------------------------------------------|--------------------------------------------------------------|---------------------------------------------|
| <b># studies approached and declined[19,27]</b>                       | 100% participation                                           | 52% participation                                                     | 100% participation                                           | On-going                                    |
| <b>Systematic search[27]</b>                                          | +/-<br>Limited syntax                                        | +                                                                     | +/-<br>Limited syntax                                        | +                                           |
| <b>Efforts to include non-published data[20]</b>                      | +                                                            | +                                                                     | -                                                            | -                                           |
| <b>Intention-to-treat analysis[27]</b>                                | +                                                            | +                                                                     | ?                                                            | +                                           |
| <b>Clustering within studies preserved in analysis[19]</b>            | +<br>Random intercepts in 1-stage model                      | +<br>2-stage model                                                    | +/-<br>Preservation in 1-stage model unclear                 | +<br>Random intercepts in 1-stage model     |
| <b>Handling missing data within studies and impact on results[27]</b> | +                                                            | ?<br>No information handling missing data                             | +/?<br>No information impact missing data                    | +                                           |
| <b>Impact of missing trials on results[19,27]</b>                     | NA                                                           | ?                                                                     | NA                                                           | +<br>Sensitivity analysis of aggregate data |
| <b>Impact of quality assessment on results[19]</b>                    | +<br>Sensitivity analysis                                    | -<br>No analysis                                                      | -<br>No analysis                                             | +<br>Sensitivity analysis                   |

NA = not applicable; + = present in study; +/- = partly present in study; - = not present in study; ? = no information in publication.

**AUTHORS' CONTRIBUTIONS**

All authors participated in developing the study design. NHJ and HW selected the studies. NHJ wrote the first draft of this manuscript. HW, JCAT, RHHW, TWET, TT, JP, JB, TJ, AWH and MJS revised several versions of the manuscript. All authors approved the final version.

**COMPETING INTERESTS**

None.

**FUNDING**

This work was supported by the Dutch Ministry of Health, Welfare and Sports, ZonMw grant number 520001002. The funding source had no involvement in the design of this study; in the writing of the report; and in the decision to submit the paper for publication.

**REFERENCE LIST**

- 1 Mathers CD, Loncar D. Projections of global mortality and burden of disease from 2002 to 2030. *PLoS Med* 2006;**3**:e442.
- 2 Mathers C, Boerma T, Ma Fat D. *The global burden of disease: 2004 update*. Geneva, Switzerland: World Health Organization 2008.
- 3 Newman S, Steed L, Mulligan K. Self-management interventions for chronic illness. *Lancet* 2004;**364**:1523-37.
- 4 Gibson PG, Powell H, Coughlan J, et al. Self-management education and regular practitioner review for adults with asthma. *Cochrane Database Syst Rev* 2003;**1**:CD001117.
- 5 Jovicic A, Holroyd-Leduc JM, Straus SE. Effects of self-management intervention on health outcomes of patients with heart failure: a systematic review of randomized controlled trials. *BMC Cardiovasc Disord* 2006;**6**:43.
- 6 Effing T, Monninkhof EM, van der Valk PD, et al. Self-management education for patients with chronic obstructive pulmonary disease. *Cochrane Database Syst Rev* 2009;**4**:CD002990.
- 7 Deakin T, McShane CE, Cade JE, Williams RD. Group based training for self-management strategies in people with type 2 diabetes mellitus. *Cochrane Database Syst Rev* 2005;**2**:CD003417.
- 8 Duke SA, Colagiuri S, Colagiuri R. Individual patient education for people with type 2 diabetes mellitus. *Cochrane Database Syst Rev* 2009;**1**:CD005268.
- 9 Malanda UL, Welschen LM, Riphagen II, et al. Self-monitoring of blood glucose in patients with type 2 diabetes mellitus who are not using insulin. *Cochrane Database Syst Rev* 2012;**1**:CD005060.
- 10 Chodosh J, Morton SC, Mojica W, et al. Meta-analysis: chronic disease self-management programs for older adults. *Ann Intern Med* 2005;**143**:427-38.



- 1  
2  
3  
4  
5  
6  
7  
8  
9  
10  
11  
12  
13  
14  
15  
16  
17  
18  
19  
20  
21  
22  
23  
24  
25  
26  
27  
28  
29  
30  
31  
32  
33  
34  
35  
36  
37  
38  
39  
40  
41  
42  
43  
44  
45  
46  
47  
48  
49  
50  
51  
52  
53  
54  
55  
56  
57  
58  
59  
60
- 11 Ditewig JB, Blok H, Havers J, et al. Effectiveness of self-management interventions on mortality, hospital readmissions, chronic heart failure hospitalization rate and quality of life in patients with chronic heart failure: a systematic review. *Patient Educ Couns* 2010;**78**:297-315.
- 12 Cochran J, Conn VS. Meta-analysis of quality of life outcomes following diabetes self-management training. *Diabetes Educ* 2008;**34**:815-23.
- 13 Fan VS, Gaziano JM, Lew R, et al. A comprehensive care management program to prevent chronic obstructive pulmonary disease hospitalizations: a randomized, controlled trial. *Ann Intern Med* 2012;**156**:673-83.
- 14 Anderson R. New MRC guidance on evaluating complex interventions. *BMJ* 2008;**337**:a1937.
- 15 Warsi A, Wang PS, LaValley MP, et al. Self-management education programs in chronic disease: a systematic review and methodological critique of the literature. *Arch Intern Med* 2004;**164**:1641-9.
- 16 van Oostrom SH, Picavet HS, van Gelder BM, et al. Multimorbidity and comorbidity in the Dutch population - data from general practices. *BMC Public Health* 2012;**12**:715.
- 17 Marengoni A, Angleman S, Melis R, et al. Aging with multimorbidity: a systematic review of the literature. *Ageing Res Rev* 2011;**10**:430-9.
- 18 Simmonds MC, Higgins JP. Covariate heterogeneity in meta-analysis: criteria for deciding between meta-regression and individual patient data. *Stat Med* 2007;**26**:2982-99.
- 19 Riley RD, Lambert PC, Abo-Zaid G. Meta-analysis of individual participant data: rationale, conduct, and reporting. *BMJ* 2010;**340**:c221.
- 20 Stewart LA, Tierney JF. To IPD or not to IPD? Advantages and disadvantages of systematic reviews using individual patient data. *Eval Health Prof* 2002;**25**:76-97.
- 21 McMurray JJ, Adamopoulos S, Anker SD, et al. ESC guidelines for the diagnosis and treatment of acute and chronic heart failure 2012: The Task Force for the Diagnosis and

- 1  
2 Treatment of Acute and Chronic Heart Failure 2012 of the European Society of  
3  
4 Cardiology. Developed in collaboration with the Heart Failure Association (HFA) of the  
5  
6 ESC. *Eur J Heart Fail* 2012;**14**:803-69.  
7  
8  
9 22 Bourbeau J, van der Palen J. Promoting effective self-management programmes to  
10  
11 improve COPD. *Eur Respir J* 2009;**33**:461-3.  
12  
13 23 Global Initiative for Chronic Obstructive Lung Disease (GOLD). *Global Strategy for the*  
14  
15 *Diagnosis, Management and Prevention of COPD*. 2014. <http://www.goldcopd.org/>  
16  
17 (accessed 7 Mar 2014).  
18  
19  
20 24 Barlow J, Wright C, Sheasby J, et al. Self-management approaches for people with chronic  
21  
22 conditions: a review. *Patient Educ Couns* 2002;**48**:177-87.  
23  
24 25 Higgins JPT, Green S. *Cochrane Handbook for Systematic Reviews of Interventions,*  
25  
26 *version 5.1.0*. The Cochrane Collaboration 2011.  
27  
28  
29 26 van Buuren S, Groothuis-Oudshoorn K. mice: Multivariate Imputation by Chained  
30  
31 Equations in R. *J Stat Soft* 2011;**45**:3.  
32  
33 27 Simmonds MC, Higgins JP, Stewart LA, et al. Meta-analysis of individual patient data  
34  
35 from randomized trials: a review of methods used in practice. *Clin Trials* 2005;**2**:209-17.  
36  
37  
38 28 Higgins JP, Thompson SG, Deeks JJ, et al. Measuring inconsistency in meta-analyses.  
39  
40 *BMJ* 2003;**327**:557-60.  
41  
42 29 Bandura A. Health promotion by social cognitive means. *Health Educ Behav* 2004;**31**:143-  
43  
44 64.  
45  
46  
47 30 Bodenheimer T, Lorig K, Holman H, et al. Patient self-management of chronic disease in  
48  
49 primary care. *J Am Med Assoc* 2002;**288**:2469-75.  
50  
51 31 Lorig KR, Holman H. Self-management education: history, definition, outcomes, and  
52  
53 mechanisms. *Ann Behav Med* 2003;**26**:1-7.  
54  
55  
56 32 Michie S, Abraham C, Whittington C, et al. Effective techniques in healthy eating and  
57  
58 physical activity interventions: a meta-regression. *Health Psychol* 2009;**28**:690-701.  
59  
60

- 1  
2  
3  
4  
5  
6  
7  
8  
9  
10  
11  
12  
13  
14  
15  
16  
17  
18  
19  
20  
21  
22  
23  
24  
25  
26  
27  
28  
29  
30  
31  
32  
33  
34  
35  
36  
37  
38  
39  
40  
41  
42  
43  
44  
45  
46  
47  
48  
49  
50  
51  
52  
53  
54  
55  
56  
57  
58  
59  
60
- 33 Conn VS, Cooper PS, Ruppar TM, et al. Searching for the intervention in intervention research reports. *J Nurs Scholarsh* 2008;**40**:52-9.
- 34 Jerant A, Kravitz R, Moore-Hill M, et al. Depressive symptoms moderated the effect of chronic illness self-management training on self-efficacy. *Med Care* 2008;**46**:523-31.
- 35 Smeulders ES, van Haastregt JC, Ambergen T, et al. Heart failure patients with a lower educational level and better cognitive status benefit most from a self-management group programme. *Patient Educ Couns* 2010;**81**:214-21.
- 36 Trappenburg J, Jonkman N, Jaarsma T, et al. Self-management: One size does not fit all. *Patient Educ Couns* 2013;**92**:134-137.
- 37 Farmer AJ, Perera R, Ward A, et al. Meta-analysis of individual patient data in randomised trials of self monitoring of blood glucose in people with non-insulin treated type 2 diabetes. *BMJ* 2012;**344**:e486.
- 38 Heneghan C, Ward A, Perera R, et al. Self-monitoring of oral anticoagulation: systematic review and meta-analysis of individual patient data. *Lancet* 2012;**379**:322-34.
- 39 Pickup JC, Freeman SC, Sutton AJ. Glycaemic control in type 1 diabetes during real time continuous glucose monitoring compared with self monitoring of blood glucose: meta-analysis of randomised controlled trials using individual patient data. *BMJ* 2011;**343**:d3805.
- 40 Resche-Rigon M, White IR, Bartlett JW, et al. Multiple imputation for handling systematically missing confounders in meta-analysis of individual participant data. *Stat Med* 2013;**32**:4890-4905.

1  
2  
3  
4  
5  
6  
7  
8  
9  
10  
11  
12  
13  
14  
15  
16  
17  
18  
19  
20  
21  
22  
23  
24  
25  
26  
27  
28  
29  
30  
31  
32  
33  
34  
35  
36  
37  
38  
39  
40  
41  
42  
43  
44  
45  
46  
47  
48  
49  
50  
51  
52  
53  
54  
55  
56  
57  
58  
59  
60

**Figure 1: Inclusion criteria for interventions.**

For peer review only

1  
2  
3  
4  
5  
6  
7  
8  
9  
10  
11  
12  
13  
14  
15  
16  
17  
18  
19  
20  
21  
22  
23  
24  
25  
26  
27  
28  
29  
30  
31  
32  
33  
34  
35  
36  
37  
38  
39  
40  
41  
42  
43  
44  
45  
46  
47  
48  
49  
50  
51  
52  
53  
54  
55  
56  
57  
58  
59  
60

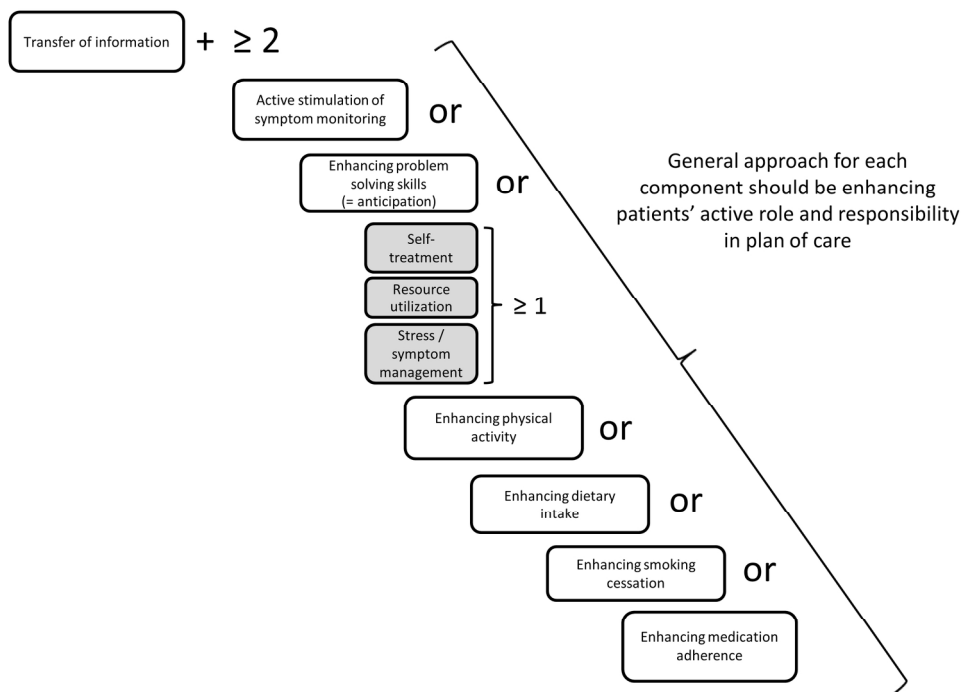

190x142mm (300 x 300 DPI)

Review only

**APPENDIX 1: SEARCH STRATEGY FOR PUBMED**

((“heart failure”[MeSH Terms] OR CHF[Title/Abstract] OR HF[Title/Abstract] OR “congestive heart failure”[Title/Abstract] OR “chronic heart failure”[Title/Abstract] OR “chronic cardiac failure” [Title/Abstract] OR “congestive cardiac failure”[Title/Abstract] OR “heart failure”[Title/Abstract] OR “cardiac failure”[Title/Abstract] OR “heart decompensation”[Title/Abstract])

OR (“pulmonary disease, chronic obstructive”[MeSH Terms] OR COPD[Title/Abstract] OR “chronic obstructive pulmonary disease”[Title/Abstract] OR “chronic obstructive airway disease”[Title/Abstract] OR “chronic airflow obstruction”[Title/Abstract] OR “chronic obstructive lung disease”[Title/Abstract] OR “chronic bronchitis”[Title/Abstract] OR bronchitis[Title/Abstract] OR emphysema[Title/Abstract] OR “lung emphysema”[Title/Abstract] OR “pulmonary emphysema”[Title/Abstract]))

AND (self-management[MeSH Terms] OR self-care[MeSH Terms] OR patient-education[MeSH Terms] OR “behavior therapy”[MeSH Terms] OR self-manag\*[Title/Abstract] OR self-car\*[Title/Abstract] OR self-monitor\*[Title/Abstract] OR self-administration[Title/Abstract] OR self-medication[Title/Abstract] OR educate[Title/Abstract] OR educated[Title/Abstract] OR education[Title/Abstract] OR educating[Title/Abstract] OR educational[Title/Abstract] OR instructed[Title/Abstract] OR instruction[Title/Abstract] OR instructions[Title/Abstract] OR instructional[Title/Abstract] OR trained[Title/Abstract] OR “action plan\*”[Title/Abstract] OR patient-educat\*[Title/Abstract] OR patient-cent\*[Title/Abstract] OR patient-focus\*[Title/Abstract] OR “behavior therapy”[Title/Abstract] OR “behaviour therapy”[Title/Abstract] OR empowerment[Title/Abstract])

AND (“randomized controlled trial”[MeSH Terms] OR “randomised controlled trial”[MeSH Terms] OR “controlled clinical trial”[MeSH Terms] OR “random allocation”[MeSH Terms] OR “evaluation studies”[MeSH Terms] OR “intervention studies”[MeSH Terms] OR “randomized controlled trial”[Title/Abstract] OR “randomised controlled trial”[Title/Abstract] OR “controlled clinical trial”[Title/Abstract] OR “clinical trial”[Title/Abstract] OR “random allocation”[Title/Abstract] OR intervention[Title/Abstract] OR trial[Title/Abstract] OR trials[Title/Abstract] OR random[Title/Abstract] OR randomized[Title/Abstract] OR randomised[Title/Abstract] OR randomization[Title/Abstract] OR randomisation[Title/Abstract] OR randomizing[Title/Abstract] OR randomising[Title/Abstract] OR randomly[Title/Abstract] OR allocate[Title/Abstract] OR allocated[Title/Abstract] OR allocating[Title/Abstract] OR allocation[Title/Abstract])

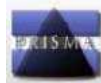

# PRISMA 2009 Checklist

| Section/topic                      | #  | Checklist item                                                                                                                                                                                                                                                                                              | Reported on page # |
|------------------------------------|----|-------------------------------------------------------------------------------------------------------------------------------------------------------------------------------------------------------------------------------------------------------------------------------------------------------------|--------------------|
| <b>TITLE</b>                       |    |                                                                                                                                                                                                                                                                                                             |                    |
| Title                              | 1  | Identify the report as a systematic review, meta-analysis, or both.                                                                                                                                                                                                                                         | 1                  |
| <b>ABSTRACT</b>                    |    |                                                                                                                                                                                                                                                                                                             |                    |
| Structured summary                 | 2  | Provide a structured summary including, as applicable: background; objectives; data sources; study eligibility criteria, participants, and interventions; study appraisal and synthesis methods; results; limitations; conclusions and implications of key findings; systematic review registration number. | 2                  |
| <b>INTRODUCTION</b>                |    |                                                                                                                                                                                                                                                                                                             |                    |
| Rationale                          | 3  | Describe the rationale for the review in the context of what is already known.                                                                                                                                                                                                                              | 4-5                |
| Objectives                         | 4  | Provide an explicit statement of questions being addressed with reference to participants, interventions, comparisons, outcomes, and study design (PICOS).                                                                                                                                                  | 5                  |
| <b>METHODS</b>                     |    |                                                                                                                                                                                                                                                                                                             |                    |
| Protocol and registration          | 5  | Indicate if a review protocol exists, if and where it can be accessed (e.g., Web address), and, if available, provide registration information including registration number.                                                                                                                               | 2                  |
| Eligibility criteria               | 6  | Specify study characteristics (e.g., PICOS, length of follow-up) and report characteristics (e.g., years considered, language, publication status) used as criteria for eligibility, giving rationale.                                                                                                      | 5-6                |
| Information sources                | 7  | Describe all information sources (e.g., databases with dates of coverage, contact with study authors to identify additional studies) in the search and date last searched.                                                                                                                                  | 5                  |
| Search                             | 8  | Present full electronic search strategy for at least one database, including any limits used, such that it could be repeated.                                                                                                                                                                               | Appendix 1         |
| Study selection                    | 9  | State the process for selecting studies (i.e., screening, eligibility, included in systematic review, and, if applicable, included in the meta-analysis).                                                                                                                                                   | 5-6                |
| Data collection process            | 10 | Describe method of data extraction from reports (e.g., piloted forms, independently, in duplicate) and any processes for obtaining and confirming data from investigators.                                                                                                                                  | 6-7                |
| Data items                         | 11 | List and define all variables for which data were sought (e.g., PICOS, funding sources) and any assumptions and simplifications made.                                                                                                                                                                       | 6,11               |
| Risk of bias in individual studies | 12 | Describe methods used for assessing risk of bias of individual studies (including specification of whether this was done at the study or outcome level), and how this information is to be used in any data synthesis.                                                                                      | 6,9                |
| Summary measures                   | 13 | State the principal summary measures (e.g., risk ratio, difference in means).                                                                                                                                                                                                                               | 8                  |
| Synthesis of results               | 14 | Describe the methods of handling data and combining results of studies, if done, including measures of consistency (e.g., $I^2$ ) for each meta-analysis.                                                                                                                                                   | 7-9                |

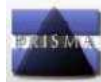

# PRISMA 2009 Checklist

1  
2  
3  
4  
5  
6  
7  
8  
9  
10  
11  
12  
13  
14  
15  
16  
17  
18  
19  
20  
21  
22  
23  
24  
25  
26  
27  
28  
29  
30  
31  
32  
33  
34  
35  
36  
37  
38  
39  
40  
41  
42  
43  
44  
45  
46  
47  
48  
49

| Section/topic                                                                | #  | Checklist item                                                                                                                                                                                           | Reported on page # |
|------------------------------------------------------------------------------|----|----------------------------------------------------------------------------------------------------------------------------------------------------------------------------------------------------------|--------------------|
| Risk of bias across studies                                                  | 15 | Specify any assessment of risk of bias that may affect the cumulative evidence (e.g., publication bias, selective reporting within studies).                                                             | 9-10               |
| Additional analyses                                                          | 16 | Describe methods of additional analyses (e.g., sensitivity or subgroup analyses, meta-regression), if done, indicating which were pre-specified.                                                         | 8-9                |
| <b>RESULTS (Items not applicable, since manuscript is study protocol)</b>    |    |                                                                                                                                                                                                          |                    |
| Study selection                                                              | 17 | Give numbers of studies screened, assessed for eligibility, and included in the review, with reasons for exclusions at each stage, ideally with a flow diagram.                                          | NA                 |
| Study characteristics                                                        | 18 | For each study, present characteristics for which data were extracted (e.g., study size, PICOS, follow-up period) and provide the citations.                                                             | NA                 |
| Risk of bias within studies                                                  | 19 | Present data on risk of bias of each study and, if available, any outcome level assessment (see item 12).                                                                                                | NA                 |
| Results of individual studies                                                | 20 | For all outcomes considered (benefits or harms), present, for each study: (a) simple summary data for each intervention group (b) effect estimates and confidence intervals, ideally with a forest plot. | NA                 |
| Synthesis of results                                                         | 21 | Present results of each meta-analysis done, including confidence intervals and measures of consistency.                                                                                                  | NA                 |
| Risk of bias across studies                                                  | 22 | Present results of any assessment of risk of bias across studies (see Item 15).                                                                                                                          | NA                 |
| Additional analysis                                                          | 23 | Give results of additional analyses, if done (e.g., sensitivity or subgroup analyses, meta-regression [see Item 16]).                                                                                    | NA                 |
| <b>DISCUSSION (Items not applicable, since manuscript is study protocol)</b> |    |                                                                                                                                                                                                          |                    |
| Summary of evidence                                                          | 24 | Summarize the main findings including the strength of evidence for each main outcome; consider their relevance to key groups (e.g., healthcare providers, users, and policy makers).                     | NA                 |
| Limitations                                                                  | 25 | Discuss limitations at study and outcome level (e.g., risk of bias), and at review-level (e.g., incomplete retrieval of identified research, reporting bias).                                            | NA                 |
| Conclusions                                                                  | 26 | Provide a general interpretation of the results in the context of other evidence, and implications for future research.                                                                                  | NA                 |
| <b>FUNDING</b>                                                               |    |                                                                                                                                                                                                          |                    |
| Funding                                                                      | 27 | Describe sources of funding for the systematic review and other support (e.g., supply of data); role of funders for the systematic review.                                                               | 14                 |



# BMJ Open

## Towards tailoring of self-management for patients with chronic heart failure or chronic obstructive pulmonary disease: protocol for an individual patient data meta-analysis



|                                 |                                                                                                                                                                                                                                                                                                                                                                                                                                                                                                                                                                                                                                                                                                                                                                                                                                                                                                                                                                                                                                                                                      |
|---------------------------------|--------------------------------------------------------------------------------------------------------------------------------------------------------------------------------------------------------------------------------------------------------------------------------------------------------------------------------------------------------------------------------------------------------------------------------------------------------------------------------------------------------------------------------------------------------------------------------------------------------------------------------------------------------------------------------------------------------------------------------------------------------------------------------------------------------------------------------------------------------------------------------------------------------------------------------------------------------------------------------------------------------------------------------------------------------------------------------------|
| Journal:                        | <i>BMJ Open</i>                                                                                                                                                                                                                                                                                                                                                                                                                                                                                                                                                                                                                                                                                                                                                                                                                                                                                                                                                                                                                                                                      |
| Manuscript ID:                  | bmjopen-2014-005220.R1                                                                                                                                                                                                                                                                                                                                                                                                                                                                                                                                                                                                                                                                                                                                                                                                                                                                                                                                                                                                                                                               |
| Article Type:                   | Protocol                                                                                                                                                                                                                                                                                                                                                                                                                                                                                                                                                                                                                                                                                                                                                                                                                                                                                                                                                                                                                                                                             |
| Date Submitted by the Author:   | 21-Apr-2014                                                                                                                                                                                                                                                                                                                                                                                                                                                                                                                                                                                                                                                                                                                                                                                                                                                                                                                                                                                                                                                                          |
| Complete List of Authors:       | Jonkman, Nini; University Medical Center Utrecht, Rehabilitation, Nursing Science and Sports<br>Westland, Heleen; University Medical Center Utrecht, Rehabilitation, Nursing Science and Sports<br>Trappenburg, Jaap; University Medical Center Utrecht, Rehabilitation, Nursing Science and Sports<br>Groenwold, Rolf; University Medical Center Utrecht, Julius Center for Health Sciences and Primary Care<br>Effing-Tijdhof, Tanja; Repatriation General Hospital, Department of Respiratory Medicine<br>Troosters, Thierry; Catholic University of Leuven, Department of Rehabilitation Sciences<br>van der Palen, Job; University of Twente, Department of Research Methodology, Measurement and Data Analysis<br>Bourbeau, Jean; McGill University, Respiratory Epidemiology Unit<br>Jaarsma, Tiny; Linköping University, Department of Social and Welfare Studies<br>Hoes, Arno; University Medical Center Utrecht, Julius Center for Health Sciences and Primary Care<br>Schuurmans, Marieke; University Medical Center Utrecht, Rehabilitation, Nursing Science and Sports |
| <b>Primary Subject Heading</b>: | Patient-centred medicine                                                                                                                                                                                                                                                                                                                                                                                                                                                                                                                                                                                                                                                                                                                                                                                                                                                                                                                                                                                                                                                             |
| Secondary Subject Heading:      | Nursing, Epidemiology                                                                                                                                                                                                                                                                                                                                                                                                                                                                                                                                                                                                                                                                                                                                                                                                                                                                                                                                                                                                                                                                |
| Keywords:                       | individual patient data meta-analysis, self-management, chronic disease, chronic heart failure, COPD                                                                                                                                                                                                                                                                                                                                                                                                                                                                                                                                                                                                                                                                                                                                                                                                                                                                                                                                                                                 |
|                                 |                                                                                                                                                                                                                                                                                                                                                                                                                                                                                                                                                                                                                                                                                                                                                                                                                                                                                                                                                                                                                                                                                      |

SCHOLARONE™  
Manuscripts

1  
2  
3  
4  
5  
6  
7  
8  
9  
10  
11  
12  
13  
14  
15  
16  
17  
18  
19  
20  
21  
22  
23  
24  
25  
26  
27  
28  
29  
30  
31  
32  
33  
34  
35  
36  
37  
38  
39  
40  
41  
42  
43  
44  
45  
46  
47  
48  
49  
50  
51  
52  
53  
54  
55  
56  
57  
58  
59  
60

## Towards tailoring of self-management for patients with chronic heart failure or chronic obstructive pulmonary disease: protocol for an individual patient data meta-analysis

Nini H. Jonkman<sup>1</sup>, Heleen Westland<sup>1</sup>, Jaap C.A. Trappenburg<sup>1</sup>, Rolf H.H. Groenwold<sup>2</sup>, Tanja W. Effing-Tijdhof<sup>3</sup>, Thierry Troosters<sup>4</sup>, Job van der Palen<sup>5</sup>, Jean Bourbeau<sup>6</sup>, Tiny Jaarsma<sup>7</sup>, Arno W. Hoes<sup>2</sup>, Marieke J. Schuurmans<sup>1</sup>

**Corresponding author:** Nini H. Jonkman

**Postal address:** University Medical Center Utrecht, Department of Rehabilitation, Nursing Science & Sports, HP W01.121, Heidelberglaan 100, 3508 GA Utrecht, The Netherlands

**E-mail:** n.jonkman@umcutrecht.nl

**Telephone:** +316 50 12 49 34

<sup>1</sup> Department of Rehabilitation, Nursing Science and Sports, University Medical Center Utrecht, Utrecht, The Netherlands

<sup>2</sup> Julius Center for Health Sciences and Primary Care, University Medical Center Utrecht, Utrecht, The Netherlands

<sup>3</sup> Department of Respiratory Medicine, Repatriation General Hospital, Daw Park, South Australia, Australia

<sup>4</sup> Department of Rehabilitation Sciences, Catholic University of Leuven, Leuven, Belgium

<sup>5</sup> Department of Research Methodology, Measurement and Data Analysis, University of Twente, Enschede, The Netherlands

<sup>6</sup> Respiratory Epidemiology Unit, McGill University, Montreal, Quebec, Canada

<sup>7</sup> Department of Social and Welfare Studies, Linköping University, Linköping, Sweden

**Keywords:**

individual patient data meta-analysis, self-management, chronic disease, chronic heart failure, COPD

**Word count:** 3.393

## ABSTRACT

**Introduction:** Self-management interventions in patients with chronic conditions have received increasing attention over the last years, yet meta-analyses encountered considerable heterogeneity in results. This suggests that effectiveness of self-management interventions must be assessed in the context of which components are responsible for eliciting the effect and in which subgroups of patients the intervention works best. The aim of the present study is to identify condition-transcending determinants of success of self-management interventions in two parallel individual patient data meta-analyses of self-management trials in patients with congestive heart failure (CHF) and in patients with chronic obstructive pulmonary disease (COPD).

**Methods and analysis:** Investigators of 53 randomized trials (32 in CHF and 21 in COPD) will be requested to share their de-identified individual patient data. Data will be analysed using random effects models, taking clustering within studies into account. Effect modification by age, sex, disease severity, symptom status, comorbid conditions and level of education will be assessed. Sensitivity analyses will be conducted to assess robustness of findings.

**Ethics and dissemination:** The de-identified individual patient data are used only for the purpose for which they were originally collected and for which ethical approval has been obtained by the original investigators. Knowledge on the effective ingredients of self-management programs and identification of subgroups of patients in which those interventions are most effective will guide the development of evidence-based personalised self-management interventions for patients with CHF and COPD, but also with other chronic diseases. This protocol has been registered in PROSPERO: CRD42013004698.

**STRENGTHS AND LIMITATIONS OF THIS STUDY**

- This individual patient data (IPD) meta-analysis will evaluate the effects of self-management interventions across two chronic conditions: patients with chronic heart failure and patients with chronic obstructive pulmonary disease.
- Embedding of the study in an international network and careful consideration of methodological challenges of the IPD approach have resulted in a robust design of data collection and analysis.
- Retrieval bias might occur if not all original investigators are willing or able to participate and not all individual patient data can be included.

For peer review only

## INTRODUCTION

With the rising number of people suffering from one or more chronic conditions,[1,2] interventions to support self-management have received increasing attention over the last years. Such interventions aim to teach patients the skills to actively participate in the management of their chronic condition and generally comprise skills for symptom monitoring, management of medication use and changing health behaviours.[3]

The evidence presented so far in meta-analyses seems to favour self-management interventions for improving a range of outcomes in various patient groups.[4-10] Yet, several authors encountered considerable heterogeneity in the outcomes analysed,[4,9] sometimes leading to contradictory findings.[11,12] A recently published large randomised controlled trial among patients with chronic obstructive pulmonary disease (COPD) even reported unexplained higher mortality rates among the patients in the intervention group, who received one group session and multiple individual sessions addressing problem-solving techniques and lifestyle changes, followed up by telephone contacts.[13]

One explanation for those ambiguous findings might be the high variation across studies evaluating self-management interventions. Self-management interventions can be regarded as complex interventions.[14] The intervention studies not only differ in procedural aspects such as content, duration and intensity,[14] but also in patient populations included and outcomes measured.[15] The question whether self-management interventions are effective cannot be answered without considering which components are responsible for eliciting the effect and identifying in which subgroups of patients the intervention is most effective. Few attempts have been made to identify determinants of success across conditions,[15] which is rather surprising since a majority of the patients with a chronic condition suffers from comorbidity.[16,17] Individual trials in different chronic conditions have reported large proportions of non-complying and non-responding patients.[3] Based on these results, the question arises if barriers to adhere to interventions and adopt self-management behaviour are disease-specific or transcend specific conditions.

Combination of studies in a meta-analysis or meta-regression might provide insight in which program-specific components are likely to be effective. Intervention studies, however, may not only differ with regard to the intervention evaluated, but also with regard to characteristics of the population included. Comparisons of patient characteristics across studies based on aggregate data in a 'classical' meta-analysis may be subjective to ecological bias.[18] A meta-analysis of individual patient data (IPD) overcomes this potential drawback and enables a straightforward analysis of both subgroups of patients in whom the intervention will be most effective and the effects of relevant components of the studied (complex) interventions.[19] Sufficient power for analysing subgroups is warranted due to the larger numbers of patients included in the analyses, which overcomes the problems with limited power of subgroup analyses experienced in individual trials.[19,20] An IPD meta-analysis therefore seems an attractive approach for unravelling the determinants of success of self-management interventions.

In order to discover determinants of success of self-management interventions for chronic disease 'at large' (i.e. condition-transcending), the present study will initiate two parallel IPD meta-analyses of self-management trials in two different chronic conditions: in patients with chronic heart failure (CHF) and in patients with COPD. The focus will be on patients with CHF or COPD because of the large number of patients confronted with either one or both of

1  
2 these conditions[2,21] and the large number of available self-management trials. Although the  
3 management of these conditions differs considerably, both patient groups are confronted with  
4 daily adherence to a drug treatment and lifestyle advice and monitoring of signs and  
5 symptoms is important for the prevention or timely detection of exacerbations.[21,22] This  
6 makes self-management an inevitable part of care for those patients groups.[21,23] In both  
7 conditions self-management interventions are extensively studied, but outcomes of published  
8 studies are heterogeneous.[6,11]  
9  
10

## 11 12 **Objectives**

13 The present paper provides a detailed description of the rationale and design for this IPD  
14 meta-analysis. The primary objective is to identify both program- and patient-specific  
15 determinants of the effect of self-management interventions on health-related quality of life  
16 (HRQoL), mortality, all-cause and disease-related hospital admissions and days in hospital in  
17 patients with CHF and patients with COPD.  
18  
19

20 In addition to two independent analyses for self-management trials in patients with CHF  
21 and patients with COPD, we will compare the results in both patient groups and investigate  
22 the similarities and differences in determinants. The secondary objective is to identify  
23 program- and patient-specific determinants of successful self-management interventions in  
24 chronic disease ‘at large’, i.e. condition-transcendent determinants.  
25  
26  
27

## 28 **METHODS AND ANALYSIS**

### 29 **Identification of studies**

30 An extensive literature search has been conducted in the electronic databases of PubMed,  
31 EMBASE, Cochrane Central Register on Controlled Trials, PsycINFO and CINAHL from  
32 January 1985 to June 2013. MeSH terms and key words in title and abstract used were  
33 “chronic heart failure”, “chronic obstructive pulmonary disease”, “self-management”, “self-  
34 care”, “patient-education”, “randomised controlled trial”, and synonyms (see online  
35 supplementary appendix 1 for PubMed search strategy as an example of the complete search  
36 terms). Reference lists of relevant systematic reviews were hand-searched and experts in the  
37 domain were consulted to ensure a complete coverage of relevant studies.  
38  
39  
40  
41

### 42 **Included studies**

43 Studies included in this IPD meta-analysis are randomised controlled trials (RCTs) with  
44 concealed allocation to treatment. Inclusion criteria for patients are an established primary  
45 diagnosis of CHF or COPD according to the prevailing international clinical  
46 guidelines.[21,23] This IPD meta-analysis aims to determine patient-specific effect modifiers,  
47 therefore no exclusion criteria apply with regard to e.g. disease severity or comorbidities.  
48  
49

50 Since a gold standard of which essential elements constitute a self-management  
51 intervention is lacking,[24] an extensive literature search was performed before an  
52 international group of 7 experts reached consensus during a conference meeting on essential  
53 components for defining ‘self-management intervention’. This resulted in inclusion criteria  
54 for interventions, with included interventions requiring a minimum of two of the following  
55 components: (1) active stimulation of symptom monitoring, (2) education in problem solving  
56 skills (i.e. self-treatment such as managing acute exacerbations, resource utilisation,  
57 stress/symptom management) and enhancement of (3) medication adherence, (4) physical  
58  
59  
60

1  
2 activity, (5) dietary intake or (6) smoking cessation. The intervention selection is  
3 schematically presented in Figure 1.  
4

5 Studies are included in the IPD meta-analysis if they (1) studied an intervention which  
6 fulfilled the requirements of the definition of self-management intervention, (2) compared the  
7 self-management intervention to usual care or another self-management intervention, (3)  
8 reported data on one or more of the relevant outcomes for this IPD meta-analysis (see below),  
9 (4) followed patients for at least six months and (5) were reported in English, Dutch, French,  
10 German, Italian, Portuguese or Spanish.  
11  
12

### 13 **Methodological quality**

14 Quality appraisal is performed by two independent researchers not involved in any of the  
15 primary studies. Methodological quality of the studies is assessed through three relevant  
16 criteria based on the 'Risk of bias' tool from the Cochrane Collaboration:[25]  
17

- 18 1. Random concealed allocation to treatment;
- 19 2. Intention-to-treat analysis;
- 20 3. Other deviances (e.g. discrepancies in baseline characteristics, high drop-out rates with  
21 unbalances between groups, risk of contamination).  
22

23 Discrepancies between the two researchers are solved through discussion with a third  
24 researcher. Results of the quality appraisal will be applied in sensitivity analyses including  
25 only studies with a low risk of bias to assess the impact of studies of lower methodological  
26 quality.  
27  
28

### 29 **Data collection**

30 Fifty-three RCTs (32 in CHF patients, 21 in COPD patients) have been selected for this IPD  
31 meta-analysis. The original investigators are requested to participate in this IPD meta-analysis  
32 through an invitation by e-mail, written in English, Spanish, Portuguese or Dutch. Email  
33 addresses have been obtained through contact details of recent publications or retrieval of  
34 affiliations. A reminder is sent after several weeks if no response is received, after which  
35 other investigators of the original trial will be approached. Only after written agreement,  
36 investigators will be asked to send their encrypted data, preferably electronically by creating  
37 encrypted files (in a WinZip file). Standardised data collection forms with the minimum  
38 required data items are provided to investigators, but they can send their data in any format  
39 most convenient for them (e.g. SAS, SPSS, Microsoft Excel spread sheet). Additionally,  
40 investigators are asked to check the extracted intervention characteristics from their studies to  
41 ensure a correct interpretation of interventions.  
42

43 Data items to be collected are based on clinical relevance, previously reported meta-  
44 analyses (program specific determinants) and subgroup analyses in RCTs (patient specific  
45 determinants). Table 1 presents the data items investigators are requested to share.  
46

47 Data will be saved in the original format as sent by the investigator and subsequently will  
48 be converted to a common SPSS format (IBM Corp. Released 2011. IBM SPSS Statistics for  
49 Windows, V.20.0 Armonyk, New York: IBM Corp) for data checking and recoding. Data of  
50 each trial will be checked with regard to range of the variables measured, extreme values,  
51 internal consistency, missing values and consistency with published reports. The details of the  
52 interventions as presented in Table 2 are cross-checked with trial protocols and published  
53  
54  
55  
56  
57  
58  
59  
60

1  
2 reports. Discrepancies with published results, missing data or inconsistencies will be verified  
3 with the original investigators and any problems resolved by consensus.  
4

5 Across studies, variables might be coded differently and recoding may be necessary to  
6 create uniform categories in the combined dataset. To ensure correct interpretation of original  
7 categories and a correct recoding, new categories are only coded after consultation of the  
8 original investigators. All datasets from individual trials will be assigned a unique trial ID  
9 before being merged into the central database.  
10  
11

### 12 **Project management**

13 One of the major challenges in IPD meta-analyses is good communication across cultural and  
14 language barriers, careful management of and negotiating with collaborating  
15 investigators.[20] For this IPD meta-analysis an international collaborative study group is  
16 established, the TASTE-IPD (Tailoring of Self-management and E-health Individual Patient  
17 Data) study group. From each original trial one representative becomes a member of the  
18 collaboration. Representatives of the trials will be invited to teleconferences (at least twice a  
19 year) and meetings scheduled during international conferences (annually). Separate  
20 teleconferences/meetings will be held for the COPD and CHF trials. During those meetings  
21 major methodological decisions and (preliminary) results will be discussed. Between  
22 meetings, members of the study group are updated on study progress through newsletters.  
23 Before submission of a manuscript for publication, a draft version will be circulated among  
24 investigators to allow for comments, revision and approval. Publications are authored with  
25 names of the investigators where possible and on behalf of the collaboration as a whole with  
26 names of other participating investigators listed in the acknowledgements. During the project,  
27 the collaboration might decide upon new research questions which can be answered through  
28 re-analysis of the combined database.  
29  
30

31 The collaboration contains a project management team responsible for management  
32 decisions within the collaboration, communication with investigators and organising  
33 teleconferences and meetings. Its members carry the responsibility for the decisions with  
34 regard to daily management of the study, collection of the individual data, development of the  
35 core dataset and statistical analysis. The project management team is supported by expert  
36 members, who are self-management experts in the fields of either CHF or COPD.  
37  
38

### 39 **Outcome measures**

40 The present study will focus on various outcome measures. These include:  
41

- 42 1. Change in HRQoL at 6 months and at 12 months. A distinction is made between disease-  
43 specific and generic HRQoL to address the different assessment of HRQoL applied in the  
44 original studies;
- 45 2. Mortality (time-to-event, % death at 6 months and at 12 months);
- 46 3. Hospitalised for any cause (time-to-event, % hospitalised at 6 months and at 12 months);
- 47 4. Total number of days spent in hospital for any cause at 6 months and at 12 months;
- 48 5. Hospitalised for resp. CHF or COPD (time-to-event, % hospitalised at 6 months and at 12  
49 months);
- 50 6. Total number of days spent in hospital for resp. CHF or COPD at 6 months and at 12  
51 months.  
52  
53  
54  
55  
56  
57  
58  
59  
60



## Statistical analyses

First, statistical analyses will be performed for CHF and COPD studies separately to meet the primary objective, but analyses will be similar. To address the secondary objective, analyses will be repeated combining the data from both patient groups to assess whether effect determinants the specific chronic condition. An additional covariate will be included in the models below to indicate the specific condition. All analyses will be performed in R for Windows version 2.15.3 (R Development Core Team. Released 2013. Vienna, Austria: R Foundation for Statistical Computing), according to the intention-to-treat principle. Missing data in studies will be addressed by using multiple imputation by chained equations.[26] Missing values will only be imputed within studies.

The IPD will be analysed using a one-stage approach, i.e. simultaneously analysing all observations while accounting for clustering of observations within studies.[27] For time-to-event data, effects of self-management will be quantified by estimating hazard ratios (HR) and 95% confidence interval (CI). Cox proportional-hazard models will be used to analyse the data, including a cluster statement to allow inter study variability. For binary outcome data (mortality, all-cause and disease-related hospital admissions), risk ratios (RR) and 95% CI will be estimated using log-binomial mixed effects models. Effects on continuous outcomes (HRQoL and days in hospital) will be quantified by mean differences and 95% CI and will be estimated using linear mixed effects models. In the log-binomial and linear mixed effects models, random intercepts and random slopes will be included to take clustering within studies into account. Heterogeneity is assessed with the  $I^2$  statistic.[28]

### *Program-specific determinants*

To identify program-specific determinants of self-management interventions, the aforementioned models are complemented with covariates for program characteristics. Table 2 presents an overview of potential program-specific determinants to be studied. The program-specific determinants are based on social cognitive theory,[29] self-management literature[24,30,31] and successful behavioural techniques.[32] Additionally, intensity and duration of interventions will be studied, since these have shown to be related to outcomes in behavioural interventions.[33] Program-specific determinants are considered significant if the p-value is <0.05.

### *Patient-specific determinants*

The aforementioned models will be extended to study effect modification by patient characteristics. Effect modification implies that the effect of the intervention on an outcome differs depending on the value of a third variable, the effect modifier. This can be studied by including interaction terms in the models. An overview of potential effect modifiers is presented in Table 2. This is a selection of clinically relevant variables, which can be expected to have been collected across the majority of trials in a comparable manner. Next to age, sex, disease severity and symptom status, the present study will focus on comorbid conditions (with specific attention to depression) and level of education, as those variables have been shown to be related to change in self-management behaviour in chronic patients.[34,35] Since the amount of effect modifiers included in the models is restricted by the total number of patients included for analysis, the optional patient-specific effect modifiers will only be included if sufficient patient data are available.

1  
2  
3  
4  
5  
6  
7  
8  
9  
10  
11  
12  
13  
14  
15  
16  
17  
18  
19  
20  
21  
22  
23  
24  
25  
26  
27  
28  
29  
30  
31  
32  
33  
34  
35  
36  
37  
38  
39  
40  
41  
42  
43  
44  
45  
46  
47  
48  
49  
50  
51  
52  
53  
54  
55  
56  
57  
58  
59  
60

To assess whether the effect of self-management is modified by pre-specified patient characteristics, each model will include interaction terms for the patient characteristics in Table 2. Hence, the independent variables in each model are the random intercepts and slopes for the individual studies, the self-management intervention, specific patient characteristic, and interaction terms (self-management by patient characteristic), with the outcome as a dependent variable. Coefficients of interaction terms will be presented with 95% CI.

### *Sensitivity analysis*

Sensitivity analysis will be performed to assess the robustness of the findings. Inclusion of aggregate data of studies for which IPD are unavailable will be performed to test whether IPD are representative of all eligible studies. A complete-case analysis will be carried out to assess the effects of imputing missing data. In addition, inclusion of only studies with a low risk of bias will be performed to assess the impact of studies of lower methodological quality on the findings. Adaptations to the statistical analysis plan will be made only after the study group has been consulted and consensus has been reached.

### **ETHICS AND DISSEMINATION**

This IPD meta-analysis has been exempted from the Medical Research Involving Human Subjects Act of the Netherlands by the Medical Ethics Research Committee of the University Medical Center Utrecht. The de-identified individual patient data are used only for the purpose for which they were originally collected and for which ethical approval has been obtained by the individual studies. In the case of re-analysis of de-identified patient data, informed consent is not deemed necessary. Data will be included in the IPD-meta-analysis only after written agreement of the original investigator and after de-identification. Data will remain property of the original investigators at all times, and they have the right to withdraw their data from the study. The shared datasets will not be used for other purposes than declared in the protocol without permission of the original investigators. Data are considered confidential and will be stored on a secured location on the digital network of the UMC Utrecht, that can only be accessed by the members of the project management team.

This project is embedded in the research line Tailoring of Self-management and E-health (TASTE), which aims to enhance the effectiveness of self-management for chronic conditions.[36] Consolidation of generating high quality scientific output is strengthened by collaboration with international universities, educational institutes and patient/provider organisations. Results of this IPD meta-analysis will be disseminated in international peer-reviewed journals and at international conferences.

### **DISCUSSION**

To our knowledge, the present study will be the first IPD meta-analysis on comprehensive self-management interventions to be conducted across two chronic conditions: CHF and COPD. We aim to identify in each patient group which program-specific and patient-specific determinants modify the effects of self-management interventions on health-related quality of life, mortality and health care use. Our secondary aim is to identify which determinants transcend both conditions and are associated with better outcomes of self-management interventions in chronic disease 'at large'. This is crucial information in view of the common

1  
2 approaches in self-management strategies across conditions and the rising number of patients  
3 with multiple chronic conditions.[16,17]

4  
5 A re-analysis of self-management trials on the level of individual patients is essential to  
6 study both program and patient characteristics as possible determinants of success.[18] IPD  
7 meta-analyses are still quite rare in the field of complex interventions,[37-39] even though the  
8 literature on methodology of IPD meta-analyses is increasing.[27] Substantial efforts have  
9 been made to carefully design the present IPD meta-analysis and anticipate on the limitations  
10 of the IPD approach. Based on lessons learned from other IPD meta-analyses in this area, the  
11 important methodological considerations are met as is shown in Table 3.[37-39] With our  
12 extensive search strategy we have minimised the chance of missing relevant trials. Since self-  
13 management interventions are complex interventions, a clear definition of in- and exclusion  
14 criteria is essential for a transparent selection of studies included. We carefully discussed and  
15 documented the reasons underlying our choice of the required data items, statistical plan and  
16 pre-planned sensitivity analyses to ensure that we collect the necessary information to assess  
17 the robustness of findings and minimise bias.

18  
19 Despite our careful methodological considerations, some of our methodological choices  
20 can be discussed. First, the choice of inclusion date. The earliest study included in our  
21 selection dates back to 1995, resulting in a timespan of nearly twenty years over which  
22 individual trials were conducted. To ensure completeness we have chosen not to exclude the  
23 first self-management trials, although the 'usual care' provided to control groups in these  
24 studies will not be comparable to usual care more recent. Second, for our primary analysis we  
25 have chosen to impute missing data only within studies. With this approach we will limit our  
26 analysis to the studies which have provided data on the selected effect modifiers, which might  
27 introduce bias if data are not missing completely at random. Another solution might be to  
28 impute missing data across studies. Yet, required multilevel methods to achieve this are quite  
29 novel and multiple imputation is generally recommended for imputing sporadic missing  
30 values instead of systematically missing data.[40] As non-collected data will be  
31 systematically missing in that specific study, we have chosen the conventional approach of  
32 multiple imputation within studies only. Third, the quality of our findings is highly depended  
33 on the quality of the original design, the quality and completeness of the data, and the level of  
34 detail provided by the original researchers.[25] Retrieval bias may occur if not all original  
35 investigators are willing or able to participate and we cannot obtain all IPD. Therefore,  
36 sensitivity analyses are planned to assess the impact on our findings.

37  
38 With this planned IPD meta-analysis we aim to advance our understanding of  
39 effectiveness of self-management interventions. Knowledge on the effective ingredients of  
40 programs contributes to the development of evidence-based personalised self-management  
41 interventions. By identifying subgroups of patients in which self-management interventions  
42 are most effective, we will be better able to tailor future interventions and personalise care for  
43 patients with chronic disease.

**Table 1: Data items investigators are requested to share.**

| <b>Study level<br/>Methodology</b>                                                                                                                                                    | <b>Study level<br/>Intervention</b>                                                                                                                                                                                                                                        | <b>Patient level<br/>Characteristics<br/>at baseline</b>                                                                                                                                                                                                                                                                                                                                                                                                | <b>Patient level<br/>Intervention as<br/>implemented</b>                                                                                                                                                                                         | <b>Patient level<br/>Outcomes</b>                                                                                                                                                                                                                                                                                                                                                                               |
|---------------------------------------------------------------------------------------------------------------------------------------------------------------------------------------|----------------------------------------------------------------------------------------------------------------------------------------------------------------------------------------------------------------------------------------------------------------------------|---------------------------------------------------------------------------------------------------------------------------------------------------------------------------------------------------------------------------------------------------------------------------------------------------------------------------------------------------------------------------------------------------------------------------------------------------------|--------------------------------------------------------------------------------------------------------------------------------------------------------------------------------------------------------------------------------------------------|-----------------------------------------------------------------------------------------------------------------------------------------------------------------------------------------------------------------------------------------------------------------------------------------------------------------------------------------------------------------------------------------------------------------|
| <ul style="list-style-type: none"> <li>• Year of recruitment</li> <li>• Location of recruitment</li> <li>• Method of randomisation</li> <li>• Blinding to group assignment</li> </ul> | <ul style="list-style-type: none"> <li>• Mode(s) of delivery</li> <li>• Content covered in intervention</li> <li>• Number of planned contacts during intervention</li> <li>• Duration of the intervention</li> <li>• Type of training given to interventionists</li> </ul> | <ul style="list-style-type: none"> <li>• Sex</li> <li>• Age</li> <li>• Years since diagnosis</li> <li>• Disease severity (CHF=LVEF; COPD=FEV1%, FEV1, FVC)</li> <li>• Symptom status (CHF = NYHA class; COPD = dyspnoea)</li> <li>• Comorbid conditions</li> <li>• Level of education</li> <li>• Ethnic minority</li> <li>• Living alone</li> <li>• Self-efficacy</li> <li>• Depression</li> <li>• Body mass index</li> <li>• Smoking status</li> </ul> | <ul style="list-style-type: none"> <li>• Number of actual contacts with patient during intervention</li> <li>• Content covered with individual patient</li> <li>• Targeted behaviour achieved</li> <li>• Loss-to-follow-up and reason</li> </ul> | <ul style="list-style-type: none"> <li>• Health-related quality of life (score on instrument)</li> <li>• Mortality (yes/no; time-to-event)</li> <li>• All-cause hospital admissions (#; time-to-first-event)</li> <li>• Disease-related hospital admissions (#; time-to-first-event)</li> <li>• All-cause days in hospital (total # days)</li> <li>• Disease-related days in hospital (total # days)</li> </ul> |

CHF = chronic/congestive heart failure; COPD = chronic obstructive pulmonary disease; FEV1 = forced expiratory volume in 1 second; FEV1% = predicted forced expiratory volume in 1 second; FVC = forced vital capacity; LVEF = left ventricular ejection fraction; NYHA = New York Heart Association.

**Table 2: Determinants to be analysed.**

| Determinants            |                                                                                                                                                                                                                                                                                                                                                                                                                                                                                                                             |
|-------------------------|-----------------------------------------------------------------------------------------------------------------------------------------------------------------------------------------------------------------------------------------------------------------------------------------------------------------------------------------------------------------------------------------------------------------------------------------------------------------------------------------------------------------------------|
| <b>Program-specific</b> | <ul style="list-style-type: none"> <li>• Number of planned contacts</li> <li>• Duration of the intervention</li> <li>• Training given to interventionists (standardised/heterogeneous)†</li> <li>• Group contact with peers (y/n)*†</li> <li>• Keeping diaries for symptom-monitoring (y/n)‡</li> <li>• Goal-setting skills (y/n)*†</li> <li>• Problem-solving skills (y/n)*†</li> <li>• Support allocation skills (y/n)†</li> </ul>                                                                                        |
| <b>Patient-specific</b> | <ul style="list-style-type: none"> <li>• Sex</li> <li>• Age</li> <li>• Disease severity</li> <li>• Symptom severity</li> <li>• Number of comorbid conditions</li> <li>• Depression</li> <li>• Level of education</li> </ul> <p><i>Optional variables (only analysed if sufficient data available):</i></p> <ul style="list-style-type: none"> <li>• <i>Recently diagnosed</i></li> <li>• <i>Self-efficacy</i></li> <li>• <i>Living status</i></li> <li>• <i>Body Mass Index</i></li> <li>• <i>Smoking status</i></li> </ul> |

\*based on social cognitive theory; †based on self-management literature; ‡based on behavioural techniques.

**Table 3: Comparison of meta-analyses of individual patient data on self-monitoring/self-management.**

| Study                                                          | Farmer et al.[37]<br><i>Self-monitoring of blood glucose</i> | Heneghan et al.[38]<br><i>Self-monitoring of oral anticoagulation</i> | Pickup et al.[39]<br><i>Self-monitoring of blood glucose</i> | TASTE-IPD<br><i>Self-management</i>         |
|----------------------------------------------------------------|--------------------------------------------------------------|-----------------------------------------------------------------------|--------------------------------------------------------------|---------------------------------------------|
| # studies approached and declined[19,27]                       | 100% participation                                           | 52% participation                                                     | 100% participation                                           | On-going                                    |
| Systematic search[27]                                          | +/-<br>Limited syntax                                        | +                                                                     | +/-<br>Limited syntax                                        | +                                           |
| Efforts to include non-published data[20]                      | +                                                            | +                                                                     | -                                                            | -                                           |
| Intention-to-treat analysis[27]                                | +                                                            | +                                                                     | ?                                                            | +                                           |
| Clustering within studies preserved in analysis[19]            | +<br>Random intercepts in 1-stage model                      | +<br>2-stage model                                                    | +/-<br>Preservation in 1-stage model unclear                 | +<br>Random intercepts in 1-stage model     |
| Handling missing data within studies and impact on results[27] | +                                                            | ?<br>No information handling missing data                             | +/?<br>No information impact missing data                    | +                                           |
| Impact of missing trials on results[19,27]                     | NA                                                           | ?                                                                     | NA                                                           | +<br>Sensitivity analysis of aggregate data |
| Impact of quality assessment on results[19]                    | +<br>Sensitivity analysis                                    | -<br>No analysis                                                      | -<br>No analysis                                             | +<br>Sensitivity analysis                   |

NA = not applicable; + = present in study; +/- = partly present in study; - = not present in study; ? = no information in publication.

**AUTHORS' CONTRIBUTIONS**

All authors participated in developing the study design. NHJ and HW selected the studies. NHJ wrote the first draft of this manuscript. HW, JCAT, RHHW, TWET, TT, JP, JB, TJ, AWH and MJS revised several versions of the manuscript. All authors approved the final version.

**COMPETING INTERESTS**

None.

**FUNDING**

This work was supported by the Dutch Ministry of Health, Welfare and Sports, ZonMw grant number 520001002. The funding source had no involvement in the design of this study; in the writing of the report; and in the decision to submit the paper for publication.

**REFERENCE LIST**

- 1 Mathers CD, Loncar D. Projections of global mortality and burden of disease from 2002 to 2030. *PLoS Med* 2006;**3**:e442.
- 2 Mathers C, Boerma T, Ma Fat D. *The global burden of disease: 2004 update*. Geneva, Switzerland: World Health Organization 2008.
- 3 Newman S, Steed L, Mulligan K. Self-management interventions for chronic illness. *Lancet* 2004;**364**:1523-37.
- 4 Gibson PG, Powell H, Coughlan J, et al. Self-management education and regular practitioner review for adults with asthma. *Cochrane Database Syst Rev* 2003;**1**:CD001117.
- 5 Jovicic A, Holroyd-Leduc JM, Straus SE. Effects of self-management intervention on health outcomes of patients with heart failure: a systematic review of randomized controlled trials. *BMC Cardiovasc Disord* 2006;**6**:43.
- 6 Effing T, Monninkhof EM, van der Valk PD, et al. Self-management education for patients with chronic obstructive pulmonary disease. *Cochrane Database Syst Rev* 2009;**4**:CD002990.
- 7 Deakin T, McShane CE, Cade JE, et al. Group based training for self-management strategies in people with type 2 diabetes mellitus. *Cochrane Database Syst Rev* 2005;**2**:CD003417.
- 8 Duke SA, Colagiuri S, Colagiuri R. Individual patient education for people with type 2 diabetes mellitus. *Cochrane Database Syst Rev* 2009;**1**:CD005268.
- 9 Malanda UL, Welschen LM, Riphagen II, et al. Self-monitoring of blood glucose in patients with type 2 diabetes mellitus who are not using insulin. *Cochrane Database Syst Rev* 2012;**1**:CD005060.
- 10 Chodosh J, Morton SC, Mojica W, et al. Meta-analysis: chronic disease self-management programs for older adults. *Ann Intern Med* 2005;**143**:427-38.



- 1  
2  
3  
4  
5  
6  
7  
8  
9  
10  
11  
12  
13  
14  
15  
16  
17  
18  
19  
20  
21  
22  
23  
24  
25  
26  
27  
28  
29  
30  
31  
32  
33  
34  
35  
36  
37  
38  
39  
40  
41  
42  
43  
44  
45  
46  
47  
48  
49  
50  
51  
52  
53  
54  
55  
56  
57  
58  
59  
60
- 11 Ditewig JB, Blok H, Havers J, et al. Effectiveness of self-management interventions on mortality, hospital readmissions, chronic heart failure hospitalization rate and quality of life in patients with chronic heart failure: a systematic review. *Patient Educ Couns* 2010;**78**:297-315.
- 12 Cochran J, Conn VS. Meta-analysis of quality of life outcomes following diabetes self-management training. *Diabetes Educ* 2008;**34**:815-23.
- 13 Fan VS, Gaziano JM, Lew R, et al. A comprehensive care management program to prevent chronic obstructive pulmonary disease hospitalizations: a randomized, controlled trial. *Ann Intern Med* 2012;**156**:673-83.
- 14 Anderson R. New MRC guidance on evaluating complex interventions. *BMJ* 2008;**337**:a1937.
- 15 Warsi A, Wang PS, LaValley MP, et al. Self-management education programs in chronic disease: a systematic review and methodological critique of the literature. *Arch Intern Med* 2004;**164**:1641-9.
- 16 van Oostrom SH, Picavet HS, van Gelder BM, et al. Multimorbidity and comorbidity in the Dutch population - data from general practices. *BMC Public Health* 2012;**12**:715.
- 17 Marengoni A, Angleman S, Melis R, et al. Aging with multimorbidity: a systematic review of the literature. *Ageing Res Rev* 2011;**10**:430-9.
- 18 Simmonds MC, Higgins JP. Covariate heterogeneity in meta-analysis: criteria for deciding between meta-regression and individual patient data. *Stat Med* 2007;**26**:2982-99.
- 19 Riley RD, Lambert PC, Abo-Zaid G. Meta-analysis of individual participant data: rationale, conduct, and reporting. *BMJ* 2010;**340**:c221.
- 20 Stewart LA, Tierney JF. To IPD or not to IPD? Advantages and disadvantages of systematic reviews using individual patient data. *Eval Health Prof* 2002;**25**:76-97.
- 21 McMurray JJ, Adamopoulos S, Anker SD, et al. ESC guidelines for the diagnosis and treatment of acute and chronic heart failure 2012: The Task Force for the Diagnosis and

- 1  
2 Treatment of Acute and Chronic Heart Failure 2012 of the European Society of  
3  
4 Cardiology. Developed in collaboration with the Heart Failure Association (HFA) of the  
5  
6 ESC. *Eur J Heart Fail* 2012;**14**:803-69.  
7  
8  
9 22 Bourbeau J, van der Palen J. Promoting effective self-management programmes to  
10  
11 improve COPD. *Eur Respir J* 2009;**33**:461-3.  
12  
13 23 Global Initiative for Chronic Obstructive Lung Disease (GOLD). *Global Strategy for the*  
14  
15 *Diagnosis, Management and Prevention of COPD*. 2014. <http://www.goldcopd.org/>  
16  
17 (accessed 7 Mar 2014).  
18  
19  
20 24 Barlow J, Wright C, Sheasby J, et al. Self-management approaches for people with chronic  
21  
22 conditions: a review. *Patient Educ Couns* 2002;**48**:177-87.  
23  
24 25 Higgins JPT, Green S. *Cochrane Handbook for Systematic Reviews of Interventions*,  
25  
26 *version 5.1.0*. The Cochrane Collaboration 2011.  
27  
28  
29 26 van Buuren S, Groothuis-Oudshoorn K. mice: Multivariate Imputation by Chained  
30  
31 Equations in R. *J Stat Soft* 2011;**45**:3.  
32  
33 27 Simmonds MC, Higgins JP, Stewart LA, et al. Meta-analysis of individual patient data  
34  
35 from randomized trials: a review of methods used in practice. *Clin Trials* 2005;**2**:209-17.  
36  
37  
38 28 Higgins JP, Thompson SG, Deeks JJ, et al. Measuring inconsistency in meta-analyses.  
39  
40 *BMJ* 2003;**327**:557-60.  
41  
42 29 Bandura A. Health promotion by social cognitive means. *Health Educ Behav* 2004;**31**:143-  
43  
44 64.  
45  
46  
47 30 Bodenheimer T, Lorig K, Holman H, et al. Patient self-management of chronic disease in  
48  
49 primary care. *J Am Med Assoc* 2002;**288**:2469-75.  
50  
51 31 Lorig KR, Holman H. Self-management education: history, definition, outcomes, and  
52  
53 mechanisms. *Ann Behav Med* 2003;**26**:1-7.  
54  
55  
56 32 Michie S, Abraham C, Whittington C, et al. Effective techniques in healthy eating and  
57  
58 physical activity interventions: a meta-regression. *Health Psychol* 2009;**28**:690-701.  
59  
60

- 1  
2  
3 33 Conn VS, Cooper PS, Ruppar TM, et al. Searching for the intervention in intervention  
4 research reports. *J Nurs Scholarsh* 2008;**40**:52-9.  
5  
6  
7 34 Jerant A, Kravitz R, Moore-Hill M, et al. Depressive symptoms moderated the effect of  
8 chronic illness self-management training on self-efficacy. *Med Care* 2008;**46**:523-31.  
9  
10  
11 35 Smeulders ES, van Haastregt JC, Ambergen T, et al. Heart failure patients with a lower  
12 educational level and better cognitive status benefit most from a self-management group  
13 programme. *Patient Educ Couns* 2010;**81**:214-21.  
14  
15  
16  
17 36 Trappenburg J, Jonkman N, Jaarsma T, et al. Self-management: One size does not fit all.  
18  
19  
20  
21  
22  
23 37 Farmer AJ, Perera R, Ward A, et al. Meta-analysis of individual patient data in randomised  
24 trials of self monitoring of blood glucose in people with non-insulin treated type 2  
25 diabetes. *BMJ* 2012;**344**:e486.  
26  
27  
28  
29 38 Heneghan C, Ward A, Perera R, et al. Self-monitoring of oral anticoagulation: systematic  
30 review and meta-analysis of individual patient data. *Lancet* 2012;**379**:322-34.  
31  
32  
33 39 Pickup JC, Freeman SC, Sutton AJ. Glycaemic control in type 1 diabetes during real time  
34 continuous glucose monitoring compared with self monitoring of blood glucose: meta-  
35 analysis of randomised controlled trials using individual patient data. *BMJ*  
36  
37  
38  
39  
40  
41  
42 40 Resche-Rigon M, White IR, Bartlett JW, et al. Multiple imputation for handling  
43 systematically missing confounders in meta-analysis of individual participant data. *Stat*  
44  
45  
46  
47  
48  
49  
50  
51  
52  
53  
54  
55  
56  
57  
58  
59  
60

1  
2  
3  
4  
5  
6  
7  
8  
9  
10  
11  
12  
13  
14  
15  
16  
17  
18  
19  
20  
21  
22  
23  
24  
25  
26  
27  
28  
29  
30  
31  
32  
33  
34  
35  
36  
37  
38  
39  
40  
41  
42  
43  
44  
45  
46  
47  
48  
49  
50  
51  
52  
53  
54  
55  
56  
57  
58  
59  
60

**Figure legend**

**Figure 1: Inclusion criteria for interventions.**

For peer review only

1  
2  
3  
4  
5  
6  
7  
8  
9  
10  
11  
12  
13  
14  
15  
16  
17  
18  
19  
20  
21  
22  
23  
24  
25  
26  
27  
28  
29  
30  
31  
32  
33  
34  
35  
36  
37  
38  
39  
40  
41  
42  
43  
44  
45  
46  
47  
48  
49  
50  
51  
52  
53  
54  
55  
56  
57  
58  
59  
60

## Towards tailoring of self-management for patients with chronic heart failure or chronic obstructive pulmonary disease: **rationale and design protocol** for an individual patient data meta-analysis

Nini H. Jonkman<sup>1</sup>, Heleen Westland<sup>1</sup>, Jaap C.A. Trappenburg<sup>1</sup>, Rolf H.H. Groenwold<sup>2</sup>, Tanja W. Effing-Tijdhof<sup>3</sup>, Thierry Troosters<sup>4</sup>, Job van der Palen<sup>5</sup>, Jean Bourbeau<sup>6</sup>, Tiny Jaarsma<sup>7</sup>, Arno W. Hoes<sup>2</sup>, Marieke J. Schuurmans<sup>1</sup>

**Corresponding author:** Nini H. Jonkman

**Postal address:** University Medical Center Utrecht, Department of Rehabilitation, Nursing Science & Sports, HP W01.121, Heidelberglaan 100, 3508 GA Utrecht, The Netherlands

**E-mail:** n.jonkman@umcutrecht.nl

**Telephone:** +316 50 12 49 34

<sup>1</sup> Department of Rehabilitation, Nursing Science and Sports, University Medical Center Utrecht, Utrecht, The Netherlands

<sup>2</sup> Julius Center for Health Sciences and Primary Care, University Medical Center Utrecht, Utrecht, The Netherlands

<sup>3</sup> Department of Respiratory Medicine, Repatriation General Hospital, Daw Park, South Australia, Australia

<sup>4</sup> Department of Rehabilitation Sciences, Catholic University of Leuven, Leuven, Belgium

<sup>5</sup> Department of Research Methodology, Measurement and Data Analysis, University of Twente, Enschede, The Netherlands

<sup>6</sup> Respiratory Epidemiology Unit, McGill University, Montreal, Quebec, Canada

<sup>7</sup> Department of Social and Welfare Studies, Linköping University, Linköping, Sweden

**Keywords:**

individual patient data meta-analysis, self-management, chronic disease, chronic heart failure, COPD

**Word count:** 3.393

**ABSTRACT**

**Introduction:** Self-management interventions in patients with chronic conditions have received increasing attention over the last years, yet meta-analyses encountered considerable heterogeneity in results. This suggests that effectiveness of self-management interventions must be assessed in the context of which components are responsible for eliciting the effect and in which subgroups of patients the intervention works best. The aim of the present study is to identify condition-transcending determinants of success of self-management interventions in two parallel individual patient data meta-analyses of self-management trials in patients with congestive heart failure (CHF) and in patients with chronic obstructive pulmonary disease (COPD).

**Methods and analysis:** Investigators of 53 randomized trials (32 in CHF and 21 in COPD) will be requested to share their de-identified individual patient data. Data will be analysed using random effects models, taking clustering within studies into account. Effect modification by age, sex, disease severity, symptom status, comorbid conditions and level of education will be assessed. Sensitivity analyses will be conducted to assess robustness of findings.

**Ethics and dissemination:** The de-identified individual patient data are used only for the purpose for which they were originally collected and for which ethical approval has been obtained by the original investigators. Knowledge on the effective ingredients of self-management programs and identification of subgroups of patients in which those interventions are most effective will guide the development of evidence-based personalised self-management interventions for patients with CHF and COPD, but also with other chronic diseases. This protocol has been registered in PROSPERO: CRD42013004698.

## STRENGTHS AND LIMITATIONS OF THIS STUDY

- This individual patient data (IPD) meta-analysis will evaluate the effects of self-management interventions across two chronic conditions: patients with chronic heart failure and patients with chronic obstructive pulmonary disease.
- Embedding of the study in an international network and careful consideration of methodological challenges of the IPD approach have resulted in a robust design of data collection and analysis.
- Retrieval bias might occur if not all original investigators are willing or able to participate and not all individual patient data can be included.

For peer review only

## INTRODUCTION

With the rising number of people suffering from one or more chronic conditions,[1,2] interventions to support self-management have received increasing attention over the last years. Such interventions aim to teach patients the skills to actively participate in the management of their chronic condition and generally comprise skills for symptom monitoring, management of medication use and changing health behaviours.[3]

The evidence presented so far in meta-analyses seems to favour self-management interventions for improving a range of outcomes in various patient groups.[4-10] Yet, several authors encountered considerable heterogeneity in the outcomes analysed,[4,9] sometimes leading to contradictory findings.[11,12] A recently published large randomised controlled trial among patients with chronic obstructive pulmonary disease (COPD) even reported unexplained higher mortality rates among the patients in the intervention group, who received one group session and multiple individual sessions addressing problem-solving techniques and lifestyle changes, followed up by telephone contacts.[13]

One explanation for those ambiguous findings might be the high variation across studies evaluating self-management interventions. Self-management interventions can be regarded as complex interventions.[14] The intervention studies not only differ in procedural aspects such as content, duration and intensity,[14] but also in patient populations included and outcomes measured.[15] The question whether self-management interventions are effective cannot be answered without considering which components are responsible for eliciting the effect and identifying in which subgroups of patients the intervention is most effective. Few attempts have been made to identify determinants of success across conditions,[15] which is rather surprising since a majority of the patients with a chronic condition suffers from comorbidity.[16,17] Individual trials in different chronic conditions have reported large proportions of non-complying and non-responding patients.[3] Based on these results, the question arises if barriers to adhere to interventions and adopt self-management behaviour are disease-specific or transcend specific conditions.

Combination of studies in a meta-analysis or meta-regression might provide insight in which program-specific components are likely to be effective. Intervention studies, however, may not only differ with regard to the intervention evaluated, but also with regard to characteristics of the population included. Comparisons of patient characteristics across studies based on aggregate data in a 'classical' meta-analysis may be subjective to ecological bias.[18] A meta-analysis of individual patient data (IPD) overcomes this potential drawback and enables a straightforward analysis of both subgroups of patients in whom the intervention will be most effective and the effects of relevant components of the studied (complex) interventions.[19] Sufficient power for analysing subgroups is warranted due to the larger numbers of patients included in the analyses, which overcomes the problems with limited power of subgroup analyses experienced in individual trials.[19,20] An IPD meta-analysis therefore seems an attractive approach for unravelling the determinants of success of self-management interventions.

In order to discover determinants of success of self-management interventions for chronic disease 'at large' (i.e. condition-transcending), the present study will initiate two parallel IPD meta-analyses of self-management trials in two different chronic conditions: in patients with chronic heart failure (CHF) and in patients with COPD. The focus will be on patients with CHF or COPD because of the large number of patients confronted with either one or both of



1  
2 these conditions[2,21] and the large number of available self-management trials. Although the  
3 management of these conditions differs considerably, both patient groups are confronted with  
4 daily adherence to a drug treatment and lifestyle advice and monitoring of signs and  
5 symptoms is important for the prevention or timely detection of exacerbations.[21,22] This  
6 makes self-management an inevitable part of care for those patients groups.[21,23] In both  
7 conditions self-management interventions are extensively studied, but outcomes of published  
8 studies are heterogeneous.[6,11]  
9  
10

## 11 12 **Objectives**

13 The present paper provides a detailed description of the rationale and design for this IPD  
14 meta-analysis. The primary objective is to identify both program- and patient-specific  
15 determinants of the effect of self-management interventions on health-related quality of life  
16 (HRQoL), mortality, all-cause and disease-related hospital admissions and days in hospital in  
17 patients with CHF and patients with COPD.  
18  
19

20 In addition to two independent analyses for self-management trials in patients with CHF  
21 and patients with COPD, we will compare the results in both patient groups and investigate  
22 the similarities and differences in determinants. The secondary objective is to identify  
23 program- and patient-specific determinants of successful self-management interventions in  
24 chronic disease ‘at large’, i.e. condition-transcendent determinants.  
25  
26  
27

## 28 **METHODS AND ANALYSIS**

### 29 **Identification of studies**

30 An extensive literature search has been conducted in the electronic databases of PubMed,  
31 EMBASE, Cochrane Central Register on Controlled Trials, PsycINFO and CINAHL from  
32 January 1985 to [June-April 2013](#). MeSH terms and key words in title and abstract used were  
33 “chronic heart failure”, “chronic obstructive pulmonary disease”, “self-management”, “self-  
34 care”, “patient-education”, “randomised controlled trial”, and synonyms (see online  
35 supplementary appendix 1 for PubMed search strategy as an example of the complete search  
36 terms). Reference lists of relevant systematic reviews were hand-searched and experts in the  
37 domain were consulted to ensure a complete coverage of relevant studies.  
38  
39  
40  
41

### 42 **Included studies**

43 Studies included in this IPD meta-analysis are randomised controlled trials (RCTs) with  
44 concealed allocation to treatment. ~~Inclusion criteria for, conducted in~~ patients ~~are with~~ an  
45 established [primary](#) diagnosis of CHF or COPD according to the prevailing international  
46 clinical guidelines.[21,23] [This IPD meta-analysis aims to determine patient-specific effect](#)  
47 [modifiers, therefore no exclusion criteria apply with regard to e.g. disease severity or](#)  
48 [comorbidities.](#)  
49  
50

51 Since a gold standard of which essential elements constitute a self-management  
52 intervention is lacking,[24] an extensive literature search was performed before an  
53 international group of 7 experts reached consensus during a conference meeting on essential  
54 components for defining ‘self-management intervention’. This resulted in [inclusion criteria](#)  
55 [for interventions, with included interventions a definition](#) requiring ~~inclusion of~~ a minimum of  
56 two of the following components ~~in the intervention~~: (1) active stimulation of symptom  
57 monitoring, (2) education in problem solving skills (i.e. self-treatment such as managing acute  
58  
59  
60

1  
2 exacerbations, resource utilisation, stress/symptom management) and enhancement of (3)  
3 medication adherence, (4) physical activity, (5) dietary intake or (6) smoking cessation. The  
4 intervention selection is schematically presented in Figure 1.  
5

6 Studies are included in the IPD meta-analysis if they (1) studied an intervention which  
7 fulfilled the requirements of the definition of self-management intervention, (2) compared the  
8 self-management intervention to usual care or another self-management intervention, (3)  
9 reported data on one or more of the relevant outcomes for this IPD meta-analysis (see below),  
10 (4) followed patients for at least six months and (5) were reported in English, Dutch, French,  
11 German, Italian, Portuguese or Spanish.  
12  
13

### 14 **Methodological quality**

15 Quality appraisal is performed by two independent researchers not involved in any of the  
16 primary studies. Methodological quality of the studies is assessed through three relevant  
17 criteria based on the 'Risk of bias' tool from the Cochrane Collaboration:[25]  
18

- 19 1. Random concealed allocation to treatment;
- 20 2. Intention-to-treat analysis;
- 21 3. Other deviances (e.g. discrepancies in baseline characteristics, high drop-out rates with  
22 unbalances between groups, risk of contamination).  
23  
24

25 Discrepancies between the two researchers are solved through discussion with a third  
26 researcher. Results of the quality appraisal will be applied in sensitivity analyses including  
27 only studies with a low risk of bias to assess the impact of studies of lower methodological  
28 quality.  
29  
30

### 31 **Data collection**

32 Fifty-three RCTs (32 in CHF patients, 21 in COPD patients) have been selected for this IPD  
33 meta-analysis. The original investigators are requested to participate in this IPD meta-analysis  
34 through an invitation by e-mail, written in English, Spanish, Portuguese or Dutch. Email  
35 addresses have been obtained through contact details of recent publications or retrieval of  
36 affiliations. A reminder is sent after several weeks if no response is received, after which  
37 other investigators of the original trial will be approached. Only after written agreement,  
38 investigators will be asked to send their encrypted data, preferably electronically by creating  
39 encrypted files (in a WinZip file). Standardised data collection forms with the minimum  
40 required data items are provided to investigators, but they can send their data in any format  
41 most convenient for them (e.g. SAS, SPSS, Microsoft Excel spread sheet). Additionally,  
42 investigators are asked to check the extracted intervention characteristics from their studies to  
43 ensure a correct interpretation of interventions.  
44  
45  
46  
47

48 Data items to be collected are based on clinical relevance, previously reported meta-  
49 analyses (program specific determinants) and subgroup analyses in RCTs (patient specific  
50 determinants). Table 1 presents the data items investigators are requested to share.  
51

52 Data will be saved in the original format as sent by the investigator and subsequently will  
53 be converted to a common SPSS format (IBM Corp. Released 2011. IBM SPSS Statistics for  
54 Windows, V.20.0 Armonyk, New York: IBM Corp) for data checking and recoding. Data of  
55 each trial will be checked with regard to range of the variables measured, extreme values,  
56 internal consistency, missing values and consistency with published reports. The details of the  
57 interventions as presented in Table 2 are cross-checked with trial protocols and published  
58  
59  
60

1  
2 reports. Discrepancies with published results, missing data or inconsistencies will be verified  
3 with the original investigators and any problems resolved by consensus.  
4

5 Across studies, variables might be coded differently and recoding may be necessary to  
6 create uniform categories in the combined dataset. To ensure correct interpretation of original  
7 categories and a correct recoding, new categories are only coded after consultation of the  
8 original investigators. All datasets from individual trials will be assigned a unique trial ID  
9 before being merged into the central database.  
10

### 11 **Project management**

12 One of the major challenges in IPD meta-analyses is good communication across cultural and  
13 language barriers, careful management of and negotiating with collaborating  
14 investigators.[20] For this IPD meta-analysis an international collaborative study group is  
15 established, the TASTE-IPD (Tailoring of Self-management and E-health Individual Patient  
16 Data) study group. From each original trial one representative becomes a member of the  
17 collaboration. Representatives of the trials will be invited to teleconferences (at least twice a  
18 year) and meetings scheduled during international conferences (annually). Separate  
19 teleconferences/meetings will be held for the COPD and CHF trials. During those meetings  
20 major methodological decisions and (preliminary) results will be discussed. Between  
21 meetings, members of the study group are updated on study progress through newsletters.  
22 Before submission of a manuscript for publication, a draft version will be circulated among  
23 investigators to allow for comments, revision and approval. Publications are authored with  
24 names of the investigators where possible and on behalf of the collaboration as a whole with  
25 names of other participating investigators listed in the acknowledgements. During the project,  
26 the collaboration might decide upon new research questions which can be answered through  
27 re-analysis of the combined database.  
28

29 The collaboration contains a project management team responsible for management  
30 decisions within the collaboration, communication with investigators and organising  
31 teleconferences and meetings. Its members carry the responsibility for the decisions with  
32 regard to daily management of the study, collection of the individual data, development of the  
33 core dataset and statistical analysis. The project management team is supported by expert  
34 members, who are self-management experts in the fields of either CHF or COPD.  
35

### 36 **Outcome measures**

37 The present study will focus on various outcome measures. These include:

- 38 1. Change in HRQoL at 6 months and at 12 months. A distinction is made between disease-  
39 specific and generic HRQoL to address the different assessment of HRQoL applied in the  
40 original studies;
- 41 2. Mortality (time-to-event, % death at 6 months and at 12 months);
- 42 3. Hospitalised for any cause (time-to-event, % hospitalised at 6 months and at 12 months);
- 43 4. Total number of days spent in hospital for any cause at 6 months and at 12 months;
- 44 5. Hospitalised for resp. CHF or COPD (time-to-event, % hospitalised at 6 months and at 12  
45 months);
- 46 6. Total number of days spent in hospital for resp. CHF or COPD at 6 months and at 12  
47 months.

### Statistical analyses

First, statistical analyses will be performed for CHF and COPD studies separately to meet the primary objective, but analyses will be similar. To address the secondary objective, analyses will be repeated combining the data from both patient groups to assess whether effect determinants the specific chronic condition. An additional covariate will be included in the models below to indicate the specific condition. All analyses will be performed in R for Windows version 2.15.3 (R Development Core Team. Released 2013. Vienna, Austria: R Foundation for Statistical Computing), according to the intention-to-treat principle. Missing data in studies will be addressed by using multiple imputation by chained equations.[26] Missing values will only be imputed within studies.

The IPD will be analysed using a one-stage approach, i.e. simultaneously analysing all observations while accounting for clustering of observations within studies.[27] For time-to-event data, effects of self-management will be quantified by estimating hazard ratios (HR) and 95% confidence interval (CI). Cox proportional-hazard models will be used to analyse the data, including a cluster statement to allow inter study variability. For binary outcome data (mortality, all-cause and disease-related hospital admissions), risk ratios (RR) and 95% CI will be estimated using log-binomial mixed effects models. Effects on continuous outcomes (HRQoL and days in hospital) will be quantified by mean differences and 95% CI and will be estimated using linear mixed effects models. In the log-binomial and linear mixed effects models, random intercepts and random slopes will be included to take clustering within studies into account. Heterogeneity is assessed with the  $I^2$  statistic.[28]

#### *Program-specific determinants*

To identify program-specific determinants of self-management interventions, the aforementioned models are complemented with covariates for program characteristics. Table 2 presents an overview of potential program-specific determinants to be studied. The program-specific determinants are based on social cognitive theory,[29] self-management literature[24,30,31] and successful behavioural techniques.[32] Additionally, intensity and duration of interventions will be studied, since these have shown to be related to outcomes in behavioural interventions.[33] Program-specific determinants are considered significant if the p-value is <0.05.

#### *Patient-specific determinants*

The aforementioned models will be extended to study effect modification by patient characteristics. Effect modification implies that the effect of the intervention on an outcome differs depending on the value of a third variable, the effect modifier. This can be studied by including interaction terms in the models. An overview of potential effect modifiers is presented in Table 2. This is a selection of clinically relevant variables, which can be expected to have been collected across the majority of trials in a comparable manner. Next to age, sex, disease severity and symptom status, the present study will focus on comorbid conditions (with specific attention to depression) and level of education, as those variables have been shown to be related to change in self-management behaviour in chronic patients.[34,35] Since the amount of effect modifiers included in the models is restricted by the total number of patients included for analysis, the optional patient-specific effect modifiers will only be included if sufficient patient data are available.

To assess whether the effect of self-management is modified by pre-specified patient characteristics, each model will include interaction terms for the patient characteristics in Table 2. Hence, the independent variables in each model are the random intercepts and slopes for the individual studies, the self-management intervention, specific patient characteristic, and interaction terms (self-management by patient characteristic), with the outcome as a dependent variable. Coefficients of interaction terms will be presented with 95% CI.

### *Sensitivity analysis*

Sensitivity analysis will be performed to assess the robustness of the findings. Inclusion of aggregate data of studies for which IPD are unavailable will be performed to test whether IPD are representative of all eligible studies. A complete-case analysis will be carried out to assess the effects of imputing missing data. In addition, inclusion of only studies with a low risk of bias will be performed to assess the impact of studies of lower methodological quality on the findings. Adaptations to the statistical analysis plan will be made only after the study group has been consulted and consensus has been reached.

### **ETHICS AND DISSEMINATION**

This IPD meta-analysis has been exempted from the Medical Research Involving Human Subjects Act of the Netherlands by the Medical Ethics Research Committee of the University Medical Center Utrecht. The de-identified individual patient data are used only for the purpose for which they were originally collected and for which ethical approval has been obtained by the individual studies. In the case of re-analysis of de-identified patient data, informed consent is not deemed necessary. Data will be included in the IPD-meta-analysis only after written agreement of the original investigator and after de-identification. Data will remain property of the original investigators at all times, and they have the right to withdraw their data from the study. The shared datasets will not be used for other purposes than declared in the protocol without permission of the original investigators. Data are considered confidential and will be stored on a secured location on the digital network of the UMC Utrecht, that can only be accessed by the members of the project management team.

This project is embedded in the research line Tailoring of Self-management and E-health (TASTE), which aims to enhance the effectiveness of self-management for chronic conditions.[36] Consolidation of generating high quality scientific output is strengthened by collaboration with international universities, educational institutes and patient/provider organisations. Results of this IPD meta-analysis will be disseminated in international peer-reviewed journals and at international conferences.

### **DISCUSSION**

To our knowledge, the present study will be the first IPD meta-analysis on comprehensive self-management interventions to be conducted across two chronic conditions: CHF and COPD. We aim to identify in each patient group which program-specific and patient-specific determinants modify the effects of self-management interventions on health-related quality of life, mortality and health care use. Our secondary aim is to identify which determinants transcend both conditions and are associated with better outcomes of self-management interventions in chronic disease 'at large'. This is crucial information in view of the common

1  
2 approaches in self-management strategies across conditions and the rising number of patients  
3 with multiple chronic conditions.[16,17]

4  
5 A re-analysis of self-management trials on the level of individual patients is essential to  
6 study both program and patient characteristics as possible determinants of success.[18] IPD  
7 meta-analyses are still quite rare in the field of complex interventions,[37-39] even though the  
8 literature on methodology of IPD meta-analyses is increasing.[27] Substantial efforts have  
9 been made to carefully design the present IPD meta-analysis and anticipate on the limitations  
10 of the IPD approach. Based on lessons learned from other IPD meta-analyses in this area, the  
11 important methodological considerations are met as is shown in Table 3.[37-39] With our  
12 extensive search strategy we have minimised the chance of missing relevant trials. Since self-  
13 management interventions are complex interventions, a clear definition of in- and exclusion  
14 criteria is essential for a transparent selection of studies included. We carefully discussed and  
15 documented the reasons underlying our choice of the required data items, statistical plan and  
16 pre-planned sensitivity analyses to ensure that we collect the necessary information to assess  
17 the robustness of findings and minimise bias.

18  
19 Despite our careful methodological considerations, some of our methodological choices  
20 can be discussed. First, the choice of inclusion date. The earliest study included in our  
21 selection dates back to 1995, resulting in a timespan of nearly twenty years over which  
22 individual trials were conducted. To ensure completeness we have chosen not to exclude the  
23 first self-management trials, although the 'usual care' provided to control groups in these  
24 studies will not be comparable to usual care more recent. Second, for our primary analysis we  
25 have chosen to impute missing data only within studies. With this approach we will limit our  
26 analysis to the studies which have provided data on the selected effect modifiers, which might  
27 introduce bias if data are not missing completely at random. Another solution might be to  
28 impute missing data across studies. Yet, required multilevel methods to achieve this are quite  
29 novel and multiple imputation is generally recommended for imputing sporadic missing  
30 values instead of systematically missing data.[40] As non-collected data will be  
31 systematically missing in that specific study, we have chosen the conventional approach of  
32 multiple imputation within studies only. Third, the quality of our findings is highly depended  
33 on the quality of the original design, the quality and completeness of the data, and the level of  
34 detail provided by the original researchers.[25] Retrieval bias may occur if not all original  
35 investigators are willing or able to participate and we cannot obtain all IPD. Therefore,  
36 sensitivity analyses are planned to assess the impact on our findings.

37  
38 With this planned IPD meta-analysis we aim to advance our understanding of  
39 effectiveness of self-management interventions. Knowledge on the effective ingredients of  
40 programs contributes to the development of evidence-based personalised self-management  
41 interventions. By identifying subgroups of patients in which self-management interventions  
42 are most effective, we will be better able to tailor future interventions and personalise care for  
43 patients with chronic disease.

**Table 1: Data items investigators are requested to share.**

| <b>Study level<br/>Methodology</b>                                                                                                                                                    | <b>Study level<br/>Intervention</b>                                                                                                                                                                                                                                        | <b>Patient level<br/>Characteristics<br/>at baseline</b>                                                                                                                                                                                                                                                                                                                                                                                                | <b>Patient level<br/>Intervention as<br/>implemented</b>                                                                                                                                                                                         | <b>Patient level<br/>Outcomes</b>                                                                                                                                                                                                                                                                                                                                                                               |
|---------------------------------------------------------------------------------------------------------------------------------------------------------------------------------------|----------------------------------------------------------------------------------------------------------------------------------------------------------------------------------------------------------------------------------------------------------------------------|---------------------------------------------------------------------------------------------------------------------------------------------------------------------------------------------------------------------------------------------------------------------------------------------------------------------------------------------------------------------------------------------------------------------------------------------------------|--------------------------------------------------------------------------------------------------------------------------------------------------------------------------------------------------------------------------------------------------|-----------------------------------------------------------------------------------------------------------------------------------------------------------------------------------------------------------------------------------------------------------------------------------------------------------------------------------------------------------------------------------------------------------------|
| <ul style="list-style-type: none"> <li>• Year of recruitment</li> <li>• Location of recruitment</li> <li>• Method of randomisation</li> <li>• Blinding to group assignment</li> </ul> | <ul style="list-style-type: none"> <li>• Mode(s) of delivery</li> <li>• Content covered in intervention</li> <li>• Number of planned contacts during intervention</li> <li>• Duration of the intervention</li> <li>• Type of training given to interventionists</li> </ul> | <ul style="list-style-type: none"> <li>• Sex</li> <li>• Age</li> <li>• Years since diagnosis</li> <li>• Disease severity (CHF=LVEF; COPD=FEV1%, FEV1, FVC)</li> <li>• Symptom status (CHF = NYHA class; COPD = dyspnoea)</li> <li>• Comorbid conditions</li> <li>• Level of education</li> <li>• Ethnic minority</li> <li>• Living alone</li> <li>• Self-efficacy</li> <li>• Depression</li> <li>• Body mass index</li> <li>• Smoking status</li> </ul> | <ul style="list-style-type: none"> <li>• Number of actual contacts with patient during intervention</li> <li>• Content covered with individual patient</li> <li>• Targeted behaviour achieved</li> <li>• Loss-to-follow-up and reason</li> </ul> | <ul style="list-style-type: none"> <li>• Health-related quality of life (score on instrument)</li> <li>• Mortality (yes/no; time-to-event)</li> <li>• All-cause hospital admissions (#; time-to-first-event)</li> <li>• Disease-related hospital admissions (#; time-to-first-event)</li> <li>• All-cause days in hospital (total # days)</li> <li>• Disease-related days in hospital (total # days)</li> </ul> |

CHF = chronic/congestive heart failure; COPD = chronic obstructive pulmonary disease; FEV1 = forced expiratory volume in 1 second; FEV1% = predicted forced expiratory volume in 1 second; FVC = forced vital capacity; LVEF = left ventricular ejection fraction; NYHA = New York Heart Association.

**Table 2: Determinants to be analysed.**

| Determinants            |                                                                                                                                                                                                                                                                                                                                                                                                                                                                                                                             |
|-------------------------|-----------------------------------------------------------------------------------------------------------------------------------------------------------------------------------------------------------------------------------------------------------------------------------------------------------------------------------------------------------------------------------------------------------------------------------------------------------------------------------------------------------------------------|
| <b>Program-specific</b> | <ul style="list-style-type: none"> <li>• Number of planned contacts</li> <li>• Duration of the intervention</li> <li>• Training given to interventionists (standardised/heterogeneous)<sup>†</sup></li> <li>• Group contact with peers (y/n)<sup>*†</sup></li> <li>• Keeping diaries for symptom-monitoring (y/n)<sup>‡</sup></li> <li>• Goal-setting skills (y/n)<sup>*†</sup></li> <li>• Problem-solving skills (y/n)<sup>*†</sup></li> <li>• Support allocation skills (y/n)<sup>†</sup></li> </ul>                      |
| <b>Patient-specific</b> | <ul style="list-style-type: none"> <li>• Sex</li> <li>• Age</li> <li>• Disease severity</li> <li>• Symptom severity</li> <li>• Number of comorbid conditions</li> <li>• Depression</li> <li>• Level of education</li> </ul> <p><i>Optional variables (only analysed if sufficient data available):</i></p> <ul style="list-style-type: none"> <li>• <i>Recently diagnosed</i></li> <li>• <i>Self-efficacy</i></li> <li>• <i>Living status</i></li> <li>• <i>Body Mass Index</i></li> <li>• <i>Smoking status</i></li> </ul> |

\*based on social cognitive theory; †based on self-management literature; ‡based on behavioural techniques.



**Table 3: Comparison of meta-analyses of individual patient data on self-monitoring/self-management.**

| Study                                                          | Farmer et al.[37]<br><i>Self-monitoring of blood glucose</i> | Heneghan et al.[38]<br><i>Self-monitoring of oral anticoagulation</i> | Pickup et al.[39]<br><i>Self-monitoring of blood glucose</i> | TASTE-IPD<br><i>Self-management</i>         |
|----------------------------------------------------------------|--------------------------------------------------------------|-----------------------------------------------------------------------|--------------------------------------------------------------|---------------------------------------------|
| # studies approached and declined[19,27]                       | 100% participation                                           | 52% participation                                                     | 100% participation                                           | On-going                                    |
| Systematic search[27]                                          | +/-<br>Limited syntax                                        | +                                                                     | +/-<br>Limited syntax                                        | +                                           |
| Efforts to include non-published data[20]                      | +                                                            | +                                                                     | -                                                            | -                                           |
| Intention-to-treat analysis[27]                                | +                                                            | +                                                                     | ?                                                            | +                                           |
| Clustering within studies preserved in analysis[19]            | +<br>Random intercepts in 1-stage model                      | +<br>2-stage model                                                    | +/-<br>Preservation in 1-stage model unclear                 | +<br>Random intercepts in 1-stage model     |
| Handling missing data within studies and impact on results[27] | +                                                            | ?<br>No information handling missing data                             | +/?<br>No information impact missing data                    | +                                           |
| Impact of missing trials on results[19,27]                     | NA                                                           | ?                                                                     | NA                                                           | +<br>Sensitivity analysis of aggregate data |
| Impact of quality assessment on results[19]                    | +<br>Sensitivity analysis                                    | -<br>No analysis                                                      | -<br>No analysis                                             | +<br>Sensitivity analysis                   |

NA = not applicable; + = present in study; +/- = partly present in study; - = not present in study; ? = no information in publication.

**AUTHORS' CONTRIBUTIONS**

All authors participated in developing the study design. NHJ and HW selected the studies. NHJ wrote the first draft of this manuscript. HW, JCAT, RHHW, TWET, TT, JP, JB, TJ, AWH and MJS revised several versions of the manuscript. All authors approved the final version.

**COMPETING INTERESTS**

None.

**FUNDING**

This work was supported by the Dutch Ministry of Health, Welfare and Sports, ZonMw grant number 520001002. The funding source had no involvement in the design of this study; in the writing of the report; and in the decision to submit the paper for publication.

**REFERENCE LIST**

- 1 Mathers CD, Loncar D. Projections of global mortality and burden of disease from 2002 to 2030. *PLoS Med* 2006;**3**:e442.
- 2 Mathers C, Boerma T, Ma Fat D. *The global burden of disease: 2004 update*. Geneva, Switzerland: World Health Organization 2008.
- 3 Newman S, Steed L, Mulligan K. Self-management interventions for chronic illness. *Lancet* 2004;**364**:1523-37.
- 4 Gibson PG, Powell H, Coughlan J, et al. Self-management education and regular practitioner review for adults with asthma. *Cochrane Database Syst Rev* 2003;**1**:CD001117.
- 5 Jovicic A, Holroyd-Leduc JM, Straus SE. Effects of self-management intervention on health outcomes of patients with heart failure: a systematic review of randomized controlled trials. *BMC Cardiovasc Disord* 2006;**6**:43.
- 6 Effing T, Monninkhof EM, van der Valk PD, et al. Self-management education for patients with chronic obstructive pulmonary disease. *Cochrane Database Syst Rev* 2009;**4**:CD002990.
- 7 Deakin T, McShane CE, Cade JE, Williams RD. Group based training for self-management strategies in people with type 2 diabetes mellitus. *Cochrane Database Syst Rev* 2005;**2**:CD003417.
- 8 Duke SA, Colagiuri S, Colagiuri R. Individual patient education for people with type 2 diabetes mellitus. *Cochrane Database Syst Rev* 2009;**1**:CD005268.
- 9 Malanda UL, Welschen LM, Riphagen II, et al. Self-monitoring of blood glucose in patients with type 2 diabetes mellitus who are not using insulin. *Cochrane Database Syst Rev* 2012;**1**:CD005060.
- 10 Chodosh J, Morton SC, Mojica W, et al. Meta-analysis: chronic disease self-management programs for older adults. *Ann Intern Med* 2005;**143**:427-38.

- 1  
2  
3 11 Ditewig JB, Blok H, Havers J, et al. Effectiveness of self-management interventions on  
4 mortality, hospital readmissions, chronic heart failure hospitalization rate and quality of  
5 life in patients with chronic heart failure: a systematic review. *Patient Educ Couns*  
6 2010;**78**:297-315.  
7  
8  
9  
10  
11 12 Cochran J, Conn VS. Meta-analysis of quality of life outcomes following diabetes self-  
12 management training. *Diabetes Educ* 2008;**34**:815-23.  
13  
14  
15 13 Fan VS, Gaziano JM, Lew R, et al. A comprehensive care management program to prevent  
16 chronic obstructive pulmonary disease hospitalizations: a randomized, controlled trial. *Ann*  
17 *Intern Med* 2012;**156**:673-83.  
18  
19  
20  
21  
22 14 Anderson R. New MRC guidance on evaluating complex interventions. *BMJ*  
23 2008;**337**:a1937.  
24  
25  
26  
27 15 Warsi A, Wang PS, LaValley MP, et al. Self-management education programs in chronic  
28 disease: a systematic review and methodological critique of the literature. *Arch Intern Med*  
29 2004;**164**:1641-9.  
30  
31  
32  
33 16 van Oostrom SH, Picavet HS, van Gelder BM, et al. Multimorbidity and comorbidity in  
34 the Dutch population - data from general practices. *BMC Public Health* 2012;**12**:715.  
35  
36  
37  
38 17 Marengoni A, Angleman S, Melis R, et al. Aging with multimorbidity: a systematic review  
39 of the literature. *Ageing Res Rev* 2011;**10**:430-9.  
40  
41  
42  
43 18 Simmonds MC, Higgins JP. Covariate heterogeneity in meta-analysis: criteria for deciding  
44 between meta-regression and individual patient data. *Stat Med* 2007;**26**:2982-99.  
45  
46  
47 19 Riley RD, Lambert PC, Abo-Zaid G. Meta-analysis of individual participant data:  
48 rationale, conduct, and reporting. *BMJ* 2010;**340**:c221.  
49  
50  
51 20 Stewart LA, Tierney JF. To IPD or not to IPD? Advantages and disadvantages of  
52 systematic reviews using individual patient data. *Eval Health Prof* 2002;**25**:76-97.  
53  
54  
55  
56 21 McMurray JJ, Adamopoulos S, Anker SD, et al. ESC guidelines for the diagnosis and  
57 treatment of acute and chronic heart failure 2012: The Task Force for the Diagnosis and  
58 treatment of acute and chronic heart failure 2012: The Task Force for the Diagnosis and  
59  
60

- 1  
2 Treatment of Acute and Chronic Heart Failure 2012 of the European Society of  
3 Cardiology. Developed in collaboration with the Heart Failure Association (HFA) of the  
4 ESC. *Eur J Heart Fail* 2012;**14**:803-69.  
5  
6  
7  
8  
9 22 Bourbeau J, van der Palen J. Promoting effective self-management programmes to  
10 improve COPD. *Eur Respir J* 2009;**33**:461-3.  
11  
12  
13 23 Global Initiative for Chronic Obstructive Lung Disease (GOLD). *Global Strategy for the*  
14 *Diagnosis, Management and Prevention of COPD*. 2014. <http://www.goldcopd.org/>  
15 (accessed 7 Mar 2014).  
16  
17  
18  
19  
20 24 Barlow J, Wright C, Sheasby J, et al. Self-management approaches for people with chronic  
21 conditions: a review. *Patient Educ Couns* 2002;**48**:177-87.  
22  
23  
24 25 Higgins JPT, Green S. *Cochrane Handbook for Systematic Reviews of Interventions,*  
25 *version 5.1.0*. The Cochrane Collaboration 2011.  
26  
27  
28  
29 26 van Buuren S, Groothuis-Oudshoorn K. mice: Multivariate Imputation by Chained  
30 Equations in R. *J Stat Soft* 2011;**45**:3.  
31  
32  
33 27 Simmonds MC, Higgins JP, Stewart LA, et al. Meta-analysis of individual patient data  
34 from randomized trials: a review of methods used in practice. *Clin Trials* 2005;**2**:209-17.  
35  
36  
37  
38 28 Higgins JP, Thompson SG, Deeks JJ, et al. Measuring inconsistency in meta-analyses.  
39 *BMJ* 2003;**327**:557-60.  
40  
41  
42 29 Bandura A. Health promotion by social cognitive means. *Health Educ Behav* 2004;**31**:143-  
43 64.  
44  
45  
46 30 Bodenheimer T, Lorig K, Holman H, et al. Patient self-management of chronic disease in  
47 primary care. *J Am Med Assoc* 2002;**288**:2469-75.  
48  
49  
50  
51 31 Lorig KR, Holman H. Self-management education: history, definition, outcomes, and  
52 mechanisms. *Ann Behav Med* 2003;**26**:1-7.  
53  
54  
55 32 Michie S, Abraham C, Whittington C, et al. Effective techniques in healthy eating and  
56 physical activity interventions: a meta-regression. *Health Psychol* 2009;**28**:690-701.  
57  
58  
59  
60

- 1  
2 33 Conn VS, Cooper PS, Ruppar TM, et al. Searching for the intervention in intervention  
3  
4 research reports. *J Nurs Scholarsh* 2008;**40**:52-9.  
5  
6  
7 34 Jerant A, Kravitz R, Moore-Hill M, et al. Depressive symptoms moderated the effect of  
8  
9 chronic illness self-management training on self-efficacy. *Med Care* 2008;**46**:523-31.  
10  
11 35 Smeulders ES, van Haastregt JC, Ambergen T, et al. Heart failure patients with a lower  
12  
13 educational level and better cognitive status benefit most from a self-management group  
14  
15 programme. *Patient Educ Couns* 2010;**81**:214-21.  
16  
17 36 Trappenburg J, Jonkman N, Jaarsma T, et al. Self-management: One size does not fit all.  
18  
19 *Patient Educ Couns* 2013;**92**:134-137.  
20  
21 37 Farmer AJ, Perera R, Ward A, et al. Meta-analysis of individual patient data in randomised  
22  
23 trials of self monitoring of blood glucose in people with non-insulin treated type 2  
24  
25 diabetes. *BMJ* 2012;**344**:e486.  
26  
27 38 Heneghan C, Ward A, Perera R, et al. Self-monitoring of oral anticoagulation: systematic  
28  
29 review and meta-analysis of individual patient data. *Lancet* 2012;**379**:322-34.  
30  
31 39 Pickup JC, Freeman SC, Sutton AJ. Glycaemic control in type 1 diabetes during real time  
32  
33 continuous glucose monitoring compared with self monitoring of blood glucose: meta-  
34  
35 analysis of randomised controlled trials using individual patient data. *BMJ*  
36  
37 2011;**343**:d3805.  
38  
39 40 Resche-Rigon M, White IR, Bartlett JW, et al. Multiple imputation for handling  
40  
41 systematically missing confounders in meta-analysis of individual participant data. *Stat*  
42  
43 *Med* 2013;**32**:4890-4905.  
44  
45  
46  
47  
48  
49  
50  
51  
52  
53  
54  
55  
56  
57  
58  
59  
60

1  
2  
3 **Figure 1: Inclusion criteria for interventions.**  
4  
5  
6  
7  
8  
9  
10  
11  
12  
13  
14  
15  
16  
17  
18  
19  
20  
21  
22  
23  
24  
25  
26  
27  
28  
29  
30  
31  
32  
33  
34  
35  
36  
37  
38  
39  
40  
41  
42  
43  
44  
45  
46  
47  
48  
49  
50  
51  
52  
53  
54  
55  
56  
57  
58  
59  
60

For peer review only

1  
2  
3  
4  
5  
6  
7  
8  
9  
10  
11  
12  
13  
14  
15  
16  
17  
18  
19  
20  
21  
22  
23  
24  
25  
26  
27  
28  
29  
30  
31  
32  
33  
34  
35  
36  
37  
38  
39  
40  
41  
42  
43  
44  
45  
46  
47  
48  
49  
50  
51  
52  
53  
54  
55  
56  
57  
58  
59  
60

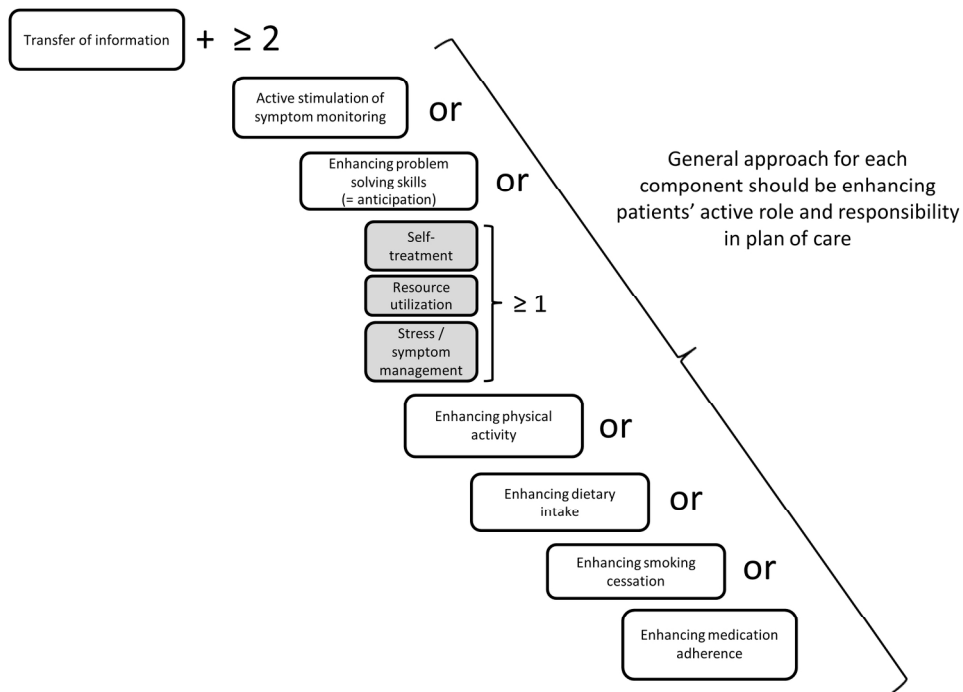

190x142mm (300 x 300 DPI)

Review only



**APPENDIX 1: SEARCH STRATEGY FOR PUBMED**

((“heart failure”[MeSH Terms] OR CHF[Title/Abstract] OR HF[Title/Abstract] OR “congestive heart failure”[Title/Abstract] OR “chronic heart failure”[Title/Abstract] OR “chronic cardiac failure” [Title/Abstract] OR “congestive cardiac failure”[Title/Abstract] OR “heart failure”[Title/Abstract] OR “cardiac failure”[Title/Abstract] OR “heart decompensation”[Title/Abstract])

OR (“pulmonary disease, chronic obstructive”[MeSH Terms] OR COPD[Title/Abstract] OR “chronic obstructive pulmonary disease”[Title/Abstract] OR “chronic obstructive airway disease”[Title/Abstract] OR “chronic airflow obstruction”[Title/Abstract] OR “chronic obstructive lung disease”[Title/Abstract] OR “chronic bronchitis”[Title/Abstract] OR bronchitis[Title/Abstract] OR emphysema[Title/Abstract] OR “lung emphysema”[Title/Abstract] OR “pulmonary emphysema”[Title/Abstract]))

AND (self-management[MeSH Terms] OR self-care[MeSH Terms] OR patient-education[MeSH Terms] OR “behavior therapy”[MeSH Terms] OR self-manag\*[Title/Abstract] OR self-car\*[Title/Abstract] OR self-monitor\*[Title/Abstract] OR self-administration[Title/Abstract] OR self-medication[Title/Abstract] OR educate[Title/Abstract] OR educated[Title/Abstract] OR education[Title/Abstract] OR educating[Title/Abstract] OR educational[Title/Abstract] OR instructed[Title/Abstract] OR instruction[Title/Abstract] OR instructions[Title/Abstract] OR instructional[Title/Abstract] OR trained[Title/Abstract] OR “action plan\*”[Title/Abstract] OR patient-educat\*[Title/Abstract] OR patient-cent\*[Title/Abstract] OR patient-focus\*[Title/Abstract] OR “behavior therapy”[Title/Abstract] OR “behaviour therapy”[Title/Abstract] OR empowerment[Title/Abstract])

AND (“randomized controlled trial”[MeSH Terms] OR “randomised controlled trial”[MeSH Terms] OR “controlled clinical trial”[MeSH Terms] OR “random allocation”[MeSH Terms] OR “evaluation studies”[MeSH Terms] OR “intervention studies”[MeSH Terms] OR “randomized controlled trial”[Title/Abstract] OR “randomised controlled trial”[Title/Abstract] OR “controlled clinical trial”[Title/Abstract] OR “clinical trial”[Title/Abstract] OR “random allocation”[Title/Abstract] OR intervention[Title/Abstract] OR trial[Title/Abstract] OR trials[Title/Abstract] OR random[Title/Abstract] OR randomized[Title/Abstract] OR randomised[Title/Abstract] OR randomization[Title/Abstract] OR randomisation[Title/Abstract] OR randomizing[Title/Abstract] OR randomising[Title/Abstract] OR randomly[Title/Abstract] OR allocate[Title/Abstract] OR allocated[Title/Abstract] OR allocating[Title/Abstract] OR allocation[Title/Abstract])

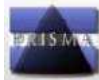

# PRISMA 2009 Checklist

| Section/topic                      | #  | Checklist item                                                                                                                                                                                                                                                                                              | Reported on page # |
|------------------------------------|----|-------------------------------------------------------------------------------------------------------------------------------------------------------------------------------------------------------------------------------------------------------------------------------------------------------------|--------------------|
| <b>TITLE</b>                       |    |                                                                                                                                                                                                                                                                                                             |                    |
| Title                              | 1  | Identify the report as a systematic review, meta-analysis, or both.                                                                                                                                                                                                                                         | 1                  |
| <b>ABSTRACT</b>                    |    |                                                                                                                                                                                                                                                                                                             |                    |
| Structured summary                 | 2  | Provide a structured summary including, as applicable: background; objectives; data sources; study eligibility criteria, participants, and interventions; study appraisal and synthesis methods; results; limitations; conclusions and implications of key findings; systematic review registration number. | 2                  |
| <b>INTRODUCTION</b>                |    |                                                                                                                                                                                                                                                                                                             |                    |
| Rationale                          | 3  | Describe the rationale for the review in the context of what is already known.                                                                                                                                                                                                                              | 4-5                |
| Objectives                         | 4  | Provide an explicit statement of questions being addressed with reference to participants, interventions, comparisons, outcomes, and study design (PICOS).                                                                                                                                                  | 5                  |
| <b>METHODS</b>                     |    |                                                                                                                                                                                                                                                                                                             |                    |
| Protocol and registration          | 5  | Indicate if a review protocol exists, if and where it can be accessed (e.g., Web address), and, if available, provide registration information including registration number.                                                                                                                               | 2                  |
| Eligibility criteria               | 6  | Specify study characteristics (e.g., PICOS, length of follow-up) and report characteristics (e.g., years considered, language, publication status) used as criteria for eligibility, giving rationale.                                                                                                      | 5-6                |
| Information sources                | 7  | Describe all information sources (e.g., databases with dates of coverage, contact with study authors to identify additional studies) in the search and date last searched.                                                                                                                                  | 5                  |
| Search                             | 8  | Present full electronic search strategy for at least one database, including any limits used, such that it could be repeated.                                                                                                                                                                               | Appendix 1         |
| Study selection                    | 9  | State the process for selecting studies (i.e., screening, eligibility, included in systematic review, and, if applicable, included in the meta-analysis).                                                                                                                                                   | 5-6                |
| Data collection process            | 10 | Describe method of data extraction from reports (e.g., piloted forms, independently, in duplicate) and any processes for obtaining and confirming data from investigators.                                                                                                                                  | 6-7                |
| Data items                         | 11 | List and define all variables for which data were sought (e.g., PICOS, funding sources) and any assumptions and simplifications made.                                                                                                                                                                       | 6,11               |
| Risk of bias in individual studies | 12 | Describe methods used for assessing risk of bias of individual studies (including specification of whether this was done at the study or outcome level), and how this information is to be used in any data synthesis.                                                                                      | 6,9                |
| Summary measures                   | 13 | State the principal summary measures (e.g., risk ratio, difference in means).                                                                                                                                                                                                                               | 8                  |
| Synthesis of results               | 14 | Describe the methods of handling data and combining results of studies, if done, including measures of consistency (e.g., $I^2$ ) for each meta-analysis.                                                                                                                                                   | 7-9                |

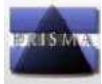

# PRISMA 2009 Checklist

1  
2  
3  
4  
5  
6  
7  
8  
9  
10  
11  
12  
13  
14  
15  
16  
17  
18  
19  
20  
21  
22  
23  
24  
25  
26  
27  
28  
29  
30  
31  
32  
33  
34  
35  
36  
37  
38  
39  
40  
41  
42  
43  
44  
45  
46  
47  
48  
49

| Section/topic                                                                | #  | Checklist item                                                                                                                                                                                           | Reported on page # |
|------------------------------------------------------------------------------|----|----------------------------------------------------------------------------------------------------------------------------------------------------------------------------------------------------------|--------------------|
| Risk of bias across studies                                                  | 15 | Specify any assessment of risk of bias that may affect the cumulative evidence (e.g., publication bias, selective reporting within studies).                                                             | 9-10               |
| Additional analyses                                                          | 16 | Describe methods of additional analyses (e.g., sensitivity or subgroup analyses, meta-regression), if done, indicating which were pre-specified.                                                         | 8-9                |
| <b>RESULTS (Items not applicable, since manuscript is study protocol)</b>    |    |                                                                                                                                                                                                          |                    |
| Study selection                                                              | 17 | Give numbers of studies screened, assessed for eligibility, and included in the review, with reasons for exclusions at each stage, ideally with a flow diagram.                                          | NA                 |
| Study characteristics                                                        | 18 | For each study, present characteristics for which data were extracted (e.g., study size, PICOS, follow-up period) and provide the citations.                                                             | NA                 |
| Risk of bias within studies                                                  | 19 | Present data on risk of bias of each study and, if available, any outcome level assessment (see item 12).                                                                                                | NA                 |
| Results of individual studies                                                | 20 | For all outcomes considered (benefits or harms), present, for each study: (a) simple summary data for each intervention group (b) effect estimates and confidence intervals, ideally with a forest plot. | NA                 |
| Synthesis of results                                                         | 21 | Present results of each meta-analysis done, including confidence intervals and measures of consistency.                                                                                                  | NA                 |
| Risk of bias across studies                                                  | 22 | Present results of any assessment of risk of bias across studies (see Item 15).                                                                                                                          | NA                 |
| Additional analysis                                                          | 23 | Give results of additional analyses, if done (e.g., sensitivity or subgroup analyses, meta-regression [see Item 16]).                                                                                    | NA                 |
| <b>DISCUSSION (Items not applicable, since manuscript is study protocol)</b> |    |                                                                                                                                                                                                          |                    |
| Summary of evidence                                                          | 24 | Summarize the main findings including the strength of evidence for each main outcome; consider their relevance to key groups (e.g., healthcare providers, users, and policy makers).                     | NA                 |
| Limitations                                                                  | 25 | Discuss limitations at study and outcome level (e.g., risk of bias), and at review-level (e.g., incomplete retrieval of identified research, reporting bias).                                            | NA                 |
| Conclusions                                                                  | 26 | Provide a general interpretation of the results in the context of other evidence, and implications for future research.                                                                                  | NA                 |
| <b>FUNDING</b>                                                               |    |                                                                                                                                                                                                          |                    |
| Funding                                                                      | 27 | Describe sources of funding for the systematic review and other support (e.g., supply of data); role of funders for the systematic review.                                                               | 14                 |

## SUPPLEMENTARY FILE: LIST OF INCLUDED STUDIES

**Included randomized trials in patients with chronic heart failure**

1. Agren S, Evangelista LS, Hjelm C, et al. Dyads affected by chronic heart failure: a randomized study evaluating effects of education and psychosocial support to patients with heart failure and their partners. *J Card Fail* 2012;**18**:359-66.
2. Aldamiz E, Muniz J, Rodriguez-Fernandez JA, et al. Randomized controlled clinical trial of a home care unit intervention to reduce readmission and death rates in patients discharged from hospital following admission for heart failure. *Rev Esp Card* 2007;**60**:914-22.
3. Angermann CE, Stork S, Gelbrich G, et al. Mode of action and effects of standardized collaborative disease management on mortality and morbidity in patients with systolic heart failure: the Interdisciplinary Network for Heart Failure (INH) study. *Circ Heart Fail* 2012;**5**:25-35.
4. Atienza F, Anguita M, Martinez-Alzamora N, et al. Multicenter randomized trial of a comprehensive hospital discharge and outpatient heart failure management program. *Eur J Heart Fail* 2004;**6**:643-52.
5. Blue L, Lang E, McMurray JJ, et al. Randomised controlled trial of specialist nurse intervention in heart failure. *BMJ* 2001;**323**:715-8.
6. Bocchi EA, Cruz F, Guimaraes G, et al. Long-term prospective, randomized, controlled study using repetitive education at six-month intervals and monitoring for adherence in heart failure outpatients: the REMADHE trial. *Circ Heart Fail* 2008;**1**:115-24.
7. Bruggink-Andre de la Porte PW, Lok DJ, van Veldhuisen DJ, et al. Added value of a physician-and-nurse-directed heart failure clinic: results from the Deventer-Alkmaar heart failure study. *Heart* 2007;**93**:819-25.
8. Cline CM, Israelsson BY, Willenheimer RB, et al. Cost effective management programme for heart failure reduces hospitalisation. *Heart* 1998;**80**:442-6.
9. DeWalt DA, Malone RM, Bryant ME, et al. A heart failure self-management program for patients of all literacy levels: a randomized, controlled trial. *BMC Health Serv Res* 2006;**6**:30.
10. DeWalt DA, Schillinger D, Ruo B, et al. Multisite randomized trial of a single-session versus multisection literacy-sensitive self-care intervention for patients with heart failure. *Circulation* 2012;**125**:2854-62.
11. Doughty RN, Wright SP, Pearl A, et al. Randomized, controlled trial of integrated heart failure management: The Auckland Heart Failure Management Study. *Eur Heart J* 2002;**23**:139-46.
12. Dunagan WC, Littenberg B, Ewald GA, et al. Randomized trial of a nurse-administered, telephone-based disease management program for patients with heart failure. *J Card Fail* 2005;**11**:358-65.
13. Heisler M, Halasyamani L, Cowen ME, et al. A Randomized Controlled Effectiveness Trial of Reciprocal Peer Support in Heart Failure. *Circ Heart Fail* 2013;**6**:246-53.
14. Jaarsma T, Halfens R, Huijter Abu-Saad H, et al. Effects of education and support on self-care and resource utilization in patients with heart failure. *Eur Heart J* 1999;**20**:673-82.
15. Jaarsma T, van der Wal MH, Lesman-Leegte I, et al. Effect of moderate or intensive disease management program on outcome in patients with heart failure: Coordinating Study Evaluating Outcomes of Advising and Counseling in Heart Failure (COACH). *Arch Intern Med* 2008;**168**:316-24.
16. Leventhal ME, Denhaerynck K, Brunner-La Rocca HP, et al. Swiss Interdisciplinary Management Programme for Heart Failure (SWIM-HF): a randomised controlled trial

- 1  
2  
3 study of an outpatient inter-professional management programme for heart failure  
4 patients in Switzerland. *Swiss Med Wkly* 2011;**141**:w13171.
- 5 17. Martensson J, Stromberg A, Dahlstrom U, et al. Patients with heart failure in primary  
6 health care: effects of a nurse-led intervention on health-related quality of life and  
7 depression. *Eur J Heart Fail* 2005;**7**:393-403.
- 8 18. Otsu H & Moriyama M. Effectiveness of an educational self-management program for  
9 outpatients with chronic heart failure. *Jpn J Nurs Sci* 2011;**8**:140-52.
- 10 19. Peters-Klimm F, Campbell S, Hermann K, et al. Case management for patients with  
11 chronic systolic heart failure in primary care: the HICMan exploratory randomised  
12 controlled trial. *Trials* 2010;**11**:56.
- 13 20. Powell LH, Calvin JE, Richardson D, et al. Self-management counseling in patients  
14 with heart failure: the heart failure adherence and retention randomized behavioral trial.  
15 *JAMA* 2010;**304**:1331-8.
- 16 21. Ramachandran K, Husain N, Maikhuri R, et al. Impact of a comprehensive telephone-  
17 based disease management programme on quality-of-life in patients with heart failure.  
18 *Natl Med J India* 2007;**20**:67-73.
- 19 22. Rich MW, Beckham V, Wittenberg C, et al. A multidisciplinary intervention to prevent  
20 the readmission of elderly patients with congestive heart failure. *N Engl J Med*  
21 1995;**333**:1190-5.
- 22 23. Riegel B, Carlson B, Glaser D, et al. Randomized controlled trial of telephone case  
23 management in Hispanics of Mexican origin with heart failure. *J Card Fail*  
24 2006;**12**:211-9.
- 25 24. Riegel B, Carlson B, Kopp Z, et al. Effect of a standardized nurse case-management  
26 telephone intervention on resource use in patients with chronic heart failure. *Arch*  
27 *Intern Med* 2002;**162**:703-12.
- 28 25. Shively MJ, Gardetto NJ, Kodiath MF, et al. Effect of Patient Activation on Self-  
29 Management in Patients With Heart Failure. *J Cardiovasc Nurs* 2013;**1**:20-34.
- 30 26. Shively M, Kodiath M, Smith TL, et al. Effect of behavioral management on quality of  
31 life in mild heart failure: a randomized controlled trial. *Patient Educ Couns*  
32 2005;**58**:27-34.
- 33 27. Sisk JE, Hebert PL, Horowitz CR, et al. Effects of nurse management on the quality of  
34 heart failure care in minority communities: a randomized trial. *Ann Intern Med*  
35 2006;**145**:273-83.
- 36 28. Smeulders ES, van Haastregt JC, Ambergen T, et al. The impact of a self-management  
37 group programme on health behaviour and healthcare utilization among congestive  
38 heart failure patients. *Eur J Heart Fail* 2009;**11**:609-16.
- 39 29. Stromberg A, Martensson J, Fridlund B, et al. Nurse-led heart failure clinics improve  
40 survival and self-care behaviour in patients with heart failure: results from a  
41 prospective, randomised trial. *Eur Heart J* 2003;**24**:1014-23.
- 42 30. Tsuyuki RT, Fradette M, Johnson JA, et al. A multicenter disease management  
43 program for hospitalized patients with heart failure. *J Card Fail* 2004;**10**:473-80.
- 44 31. Varma S, McElnay JC, Hughes CM, et al. Pharmaceutical care of patients with  
45 congestive heart failure: interventions and outcomes. *Pharmacotherapy* 1999;**19**:860-9.
- 46 32. Wakefield BJ, Ward MM, Holman JE, et al. Evaluation of home telehealth following  
47 hospitalization for heart failure: a randomized trial. *Telemed J E Health* 2008;**14**:753-  
48 61.  
49  
50  
51  
52  
53  
54  
55  
56  
57  
58  
59  
60

**Included randomized trials in patients with chronic obstructive pulmonary disease**

1. Bischoff EW, Akkermans R, Bourbeau J, et al. Comprehensive self-management and routine monitoring in chronic obstructive pulmonary disease patients in general practice: randomised controlled trial. *BMJ* 2012;**345**:e7642.
2. Bourbeau J, Julien M, Maltais F, et al. Reduction of hospital utilization in patients with chronic obstructive pulmonary disease: a disease-specific self-management intervention. *Arch Intern Med* 2003;**163**:585-91.
3. Bucknall CE, Miller G, Lloyd SM, et al. Glasgow supported self-management trial (GSuST) for patients with moderate to severe COPD: randomised controlled trial. *BMJ* 2012;**344**:e1060.
4. Casas A, Troosters T, Garcia-Aymerich J, et al. Integrated care prevents hospitalisations for exacerbations in COPD patients. *Eur Respir J* 2006;**28**:123-30.
5. Coultas D, Frederick J, Barnett B, et al. A randomized trial of two types of nurse-assisted home care for patients with COPD. *Chest* 2005;**128**:2017-24.
6. Effing T, Kerstjens H, van der Valk P, et al. (Cost)-effectiveness of self-treatment of exacerbations on the severity of exacerbations in patients with COPD: the COPE II study. *Thorax* 2009;**64**:956-62.
7. Fan VS, Gaziano JM, Lew R, et al. A comprehensive care management program to prevent chronic obstructive pulmonary disease hospitalizations: a randomized, controlled trial. *Ann Intern Med* 2012;**156**:673-83.
8. Gallefoss F, Bakke PS, Rsgaard PK. Quality of life assessment after patient education in a randomized controlled study on asthma and chronic obstructive pulmonary disease. *Am J Respir Crit Care Med* 1999;**159**:812-7.
9. Khdour MR, Kidney JC, Smyth BM, et al. Clinical pharmacy-led disease and medicine management programme for patients with COPD. *Br J Clin Pharmacol* 2009;**68**:588-98.
10. McGeoch GR, Willsman KJ, Dowson CA, et al. Self-management plans in the primary care of patients with chronic obstructive pulmonary disease. *Respirology* 2006;**11**:611-8.
11. Monninkhof E, van der Valk P, van der Palen J, et al. Effects of a comprehensive self-management programme in patients with chronic obstructive pulmonary disease. *Eur Respir J* 2003;**22**:815-20.
12. Nguyen HQ, Donesky D, Reinke LF, et al. Internet-Based Dyspnea Self-Management Support for Patients With Chronic Obstructive Pulmonary Disease. *J Pain Symptom Manage* 2013;**46**:43-55.
13. Ninot G, Moullec G, Picot MC, et al. Cost-saving effect of supervised exercise associated to COPD self-management education program. *Respir Med* 2011;**105**:377-85.
14. Rea H, McAuley S, Stewart A, et al. A chronic disease management programme can reduce days in hospital for patients with chronic obstructive pulmonary disease. *Intern Med J* 2004;**34**:608-14.
15. Rice KL, Dewan N, Bloomfield HE, et al. Disease management program for chronic obstructive pulmonary disease: a randomized controlled trial. *Am J Respir Crit Care Med* 2010;**182**:890-6.
16. Taylor SJC, Sohanpal R, Bremner SA, et al. Self-management support for moderate-to-severe chronic obstructive pulmonary disease: A pilot randomised controlled trial. *Br J Gen Pract* 2012;**62**:e687-95.
17. Trappenburg JC, Monninkhof EM, Bourbeau J, et al. Effect of an action plan with ongoing support by a case manager on exacerbation-related outcome in patients with COPD: a multicentre randomised controlled trial. *Thorax* 2011;**66**:977-84.

18. Wakabayashi R, Motegi T, Yamada K, et al. Efficient integrated education for older patients with chronic obstructive pulmonary disease using the Lung Information Needs Questionnaire. *Geriatr Gerontol Int* 2011;**11**:422-30.
19. Watson PB, Town GI, Holbrook N, et al. Evaluation of a self-management plan for chronic obstructive pulmonary disease. *Eur Respir J* 1997;**10**:1267-71.
20. Wood-Baker R, McGlone S, Venn A, et al. Written action plans in chronic obstructive pulmonary disease increase appropriate treatment for acute exacerbations. *Respirology* 2006;**11**:619-26.
21. Zwar NA, Hermiz O, Comino E, et al. Care of patients with a diagnosis of chronic obstructive pulmonary disease: a cluster randomised controlled trial. *Med J Aust* 2012;**197**:394-8.
